# Supplementary material
Source: PubMed Central journal article supplement (PMC6179444)
Supplement: NIHMS979464-supplement-si2.pdf [file NIHMS979464-supplement-si2.pdf]

## Supporting Information

# Novel K-Ras G12C Switch-II Covalent Binders Destabilize Ras and Accelerate Nucleotide Exchange

*Chimno I. Nnadi<sup>1</sup>, Meredith L. Jenkins<sup>2</sup>, Daniel R. Gentile<sup>1</sup>, Leslie A. Bateman<sup>3</sup>, Daniel Zaidman<sup>4</sup>,  
Trent E. Balius<sup>5</sup>, Daniel K. Nomura<sup>3</sup>, John E. Burke<sup>2</sup>, Kevan M. Shokat<sup>1</sup>, Nir London<sup>4\*</sup>*

<sup>1</sup>Department of Cellular and Molecular Pharmacology, Howard Hughes Medical Institute, University of California, San Francisco, California 94158, United States.

<sup>2</sup>Department of Biochemistry and Microbiology. University of Victoria, Victoria, BC V8W 2Y2, Canada.

<sup>3</sup>Departments of Chemistry, Molecular and Cell Biology, and Nutritional Sciences and Toxicology, University of California, Berkeley, Berkeley, CA 94720, United States.

<sup>4</sup>Department of Organic Chemistry, The Weizmann Institute of Science, Rehovot, 7610001, Israel.

<sup>5</sup>Department of Pharmaceutical Chemistry, University of California San Francisco, San Francisco, California, 94158, United States.

\* Corresponding author: [nir.london@weizmann.ac.il](mailto:nir.london@weizmann.ac.il)

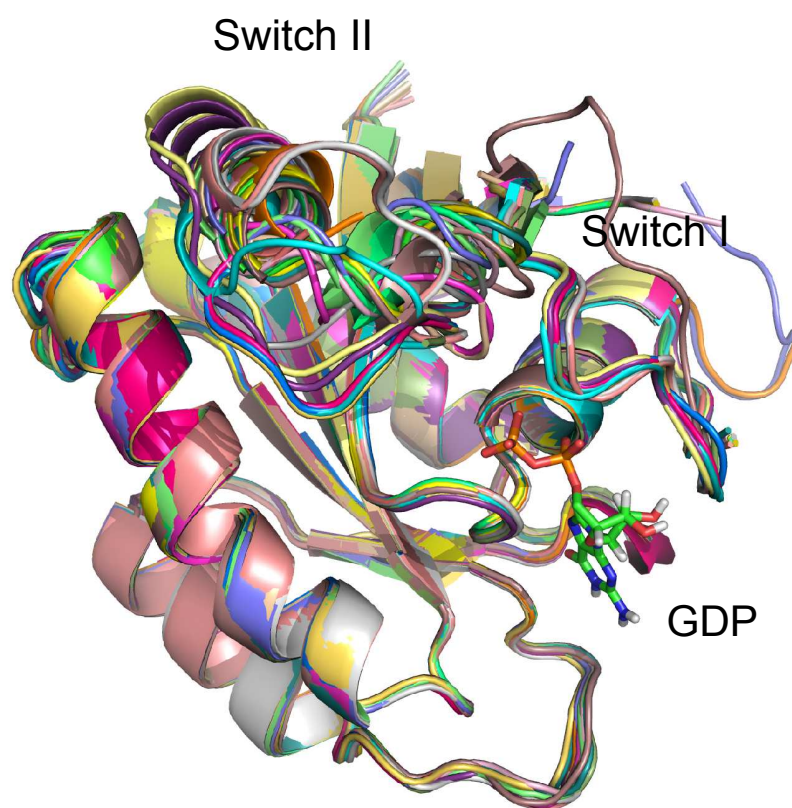

**Figure S1.** Structural alignment of 24 ligand-bound monomers of K-Ras<sup>G12C</sup>.

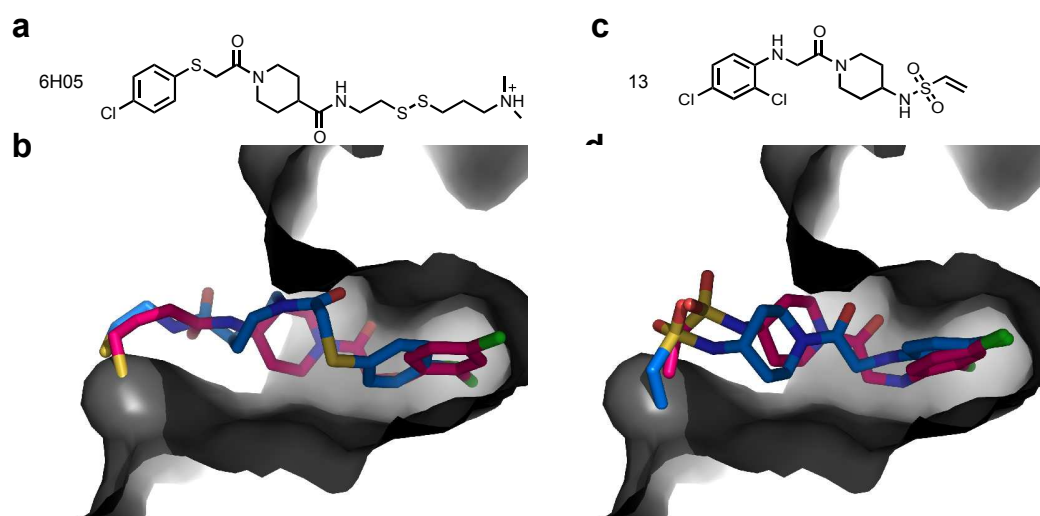

**Figure S2.** a. Structure of disulfide tethering hit, 6H05. b. Docking pose of 6H05 (blue) in docking model (PDB: 4M1S chain B) aligned to co-crystal structure of tethering analogue (magenta) (PDB: 4LUC). c. Structure of ligand 13. d. Docking pose of 13 (blue) aligned to co-crystal structure of 13 (magenta; PDB: 4M1S chain B).

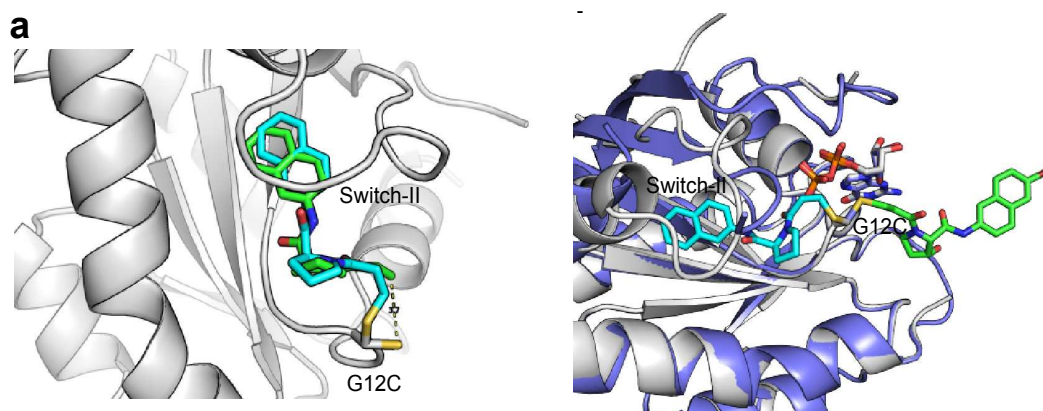

**Figure S3. a.** DOCK pose (green) and DOCKoivalent pose (cyan) of compound 1 overlay closely with only a slight rotation of the amide bond in the pyrrolidine-2-carboxamide linker. **b.** Alignment of DOCKoivalent pose of compound 1 (cyan; protein in slate) to crystal structure of K-Ras<sup>G12C</sup> (white; PDB: 6ARK) in complex with compound 10 (green).

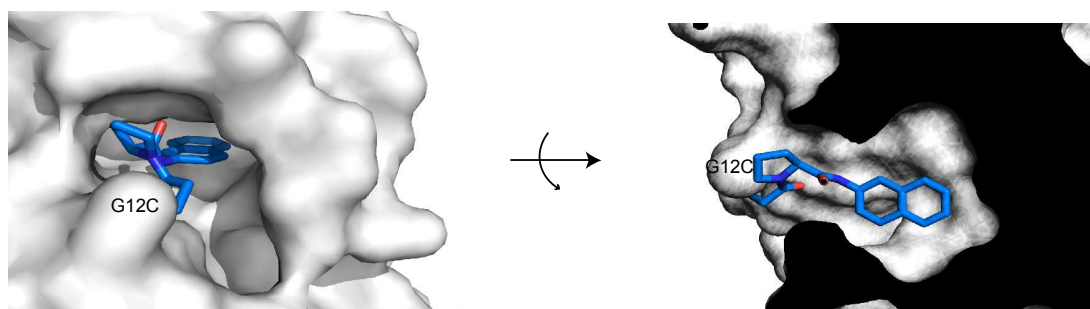

**Figure S4.** Surface representation of K-Ras<sup>G12C</sup> with the docking pose of compound 1 depicting the interior of the S-IIP.

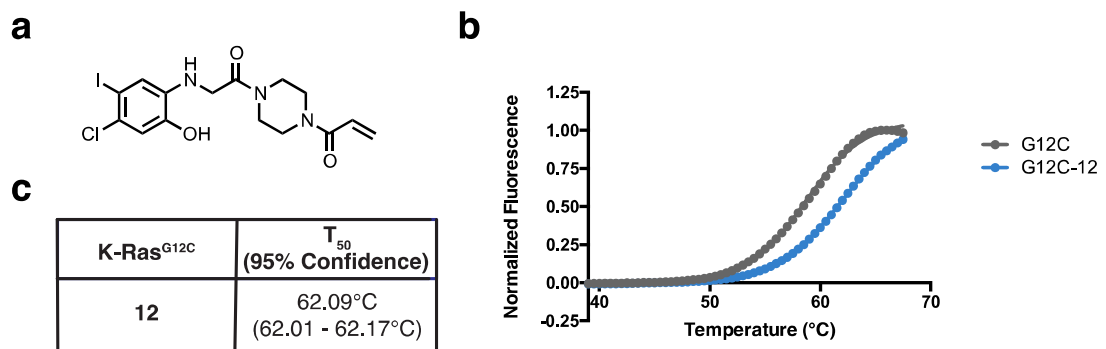

**Figure S5. a.** Structure of compound 12. **b.** Thermal stability assay of K-Ras<sup>G12C</sup> labeled with compound 12 and **c.** the T<sub>50</sub> melting temperature.



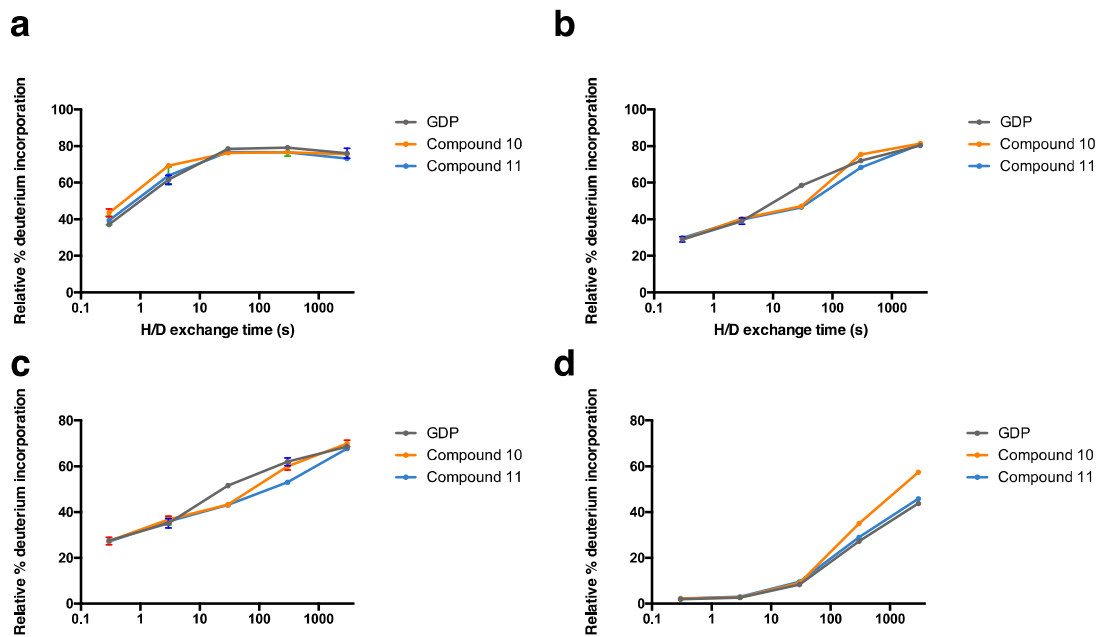

**Figure S7.** Relative %deuterium incorporation over time in **a.** peptides 34-39 (Switch-I region) **b.** peptides 38-52 **c.** peptides 53-63 (Switch-II region) and **d.** peptides 133-144. HDX curves are the average of three independent experiments (error bars represent SD).



**Table S1.** Crystal structures used for docking.

| <b>Ligand-bound K-Ras monomers used for docking studies</b> |              |              |                |
|-------------------------------------------------------------|--------------|--------------|----------------|
| 4M21 chain B                                                | 4M1S chain B | 4M22 chain B | 56A chain B*   |
| 4LYJ                                                        | 4LUC chain A | 4M22 chain C | 56A chain C*   |
| 4LYH chain B                                                | 4LUC chain B | 4M1T chain B | 56A chain D*   |
| 4LYH chain C                                                | 4LV6 chain A | 59 chain B*  | 56A chain E*   |
| 4LYF chain B                                                | 4LV6 chain B | 59 chain C*  | 55_P1 chain A* |
| 4M1Y chain B                                                | 4M1O chain B | 56A chain A* | 55_P1 chain B* |

\*Crystal structures are not deposited in the Protein Data Bank.

**Table S2.** Percent modification of cys-light K-Ras<sup>G12C</sup> 1-169 and K-Ras<sup>WT</sup> 1-189 by compounds in DOCKoalent Library

| Compound Structure                                                                  | Name        | Mass   | % Labeling of K-Ras <sup>G12C</sup> | % Labeling of K-Ras <sup>WT</sup> 1-189 |
|-------------------------------------------------------------------------------------|-------------|--------|-------------------------------------|-----------------------------------------|
| 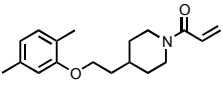   | <b>S1-1</b> | 287.40 | 0                                   | 0                                       |
|    | <b>S1-2</b> | 295.38 | 0                                   | 0                                       |
|   | <b>S1-3</b> | 255.31 | 0                                   | 0                                       |
|  | <b>S1-4</b> | 281.35 | 0                                   | 0                                       |
|  | <b>S1-5</b> | 293.36 | 0                                   | 61.7                                    |
|  | <b>S1-6</b> | 258.36 | 0                                   | 0                                       |
|  | <b>S1-7</b> | 255.31 | 0                                   | 24.2                                    |
|  | <b>S1-8</b> | 243.26 | 0                                   | 0                                       |

|                                                                                     |              |        |    |      |
|-------------------------------------------------------------------------------------|--------------|--------|----|------|
| 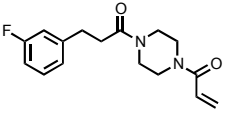   | <b>S1-9</b>  | 290.33 | 0  | 0    |
|    | <b>S1-10</b> | 271.31 | 0  | 0    |
|    | <b>S1-11</b> | 301.38 | 0  | 0    |
|    | <b>S1-12</b> | 227.26 | 0  | 0    |
|   | <b>S1-13</b> | 298.42 | 0  | 0    |
|  | <b>2</b>     | 289.40 | 20 | 0    |
|  | <b>S1-14</b> | 290.36 | 0  | 0    |
|  | <b>1</b>     | 294.35 | 41 | 43.5 |
|  | <b>S1-15</b> | 262.73 | 0  | 0    |
|  | <b>S1-16</b> | 273.33 | 0  | 23.6 |
|  | <b>S1-17</b> | 239.27 | 0  | 0    |
|  | <b>S1-18</b> | 281.31 | 0  | 0    |

|                                                                                     |              |        |   |      |
|-------------------------------------------------------------------------------------|--------------|--------|---|------|
| 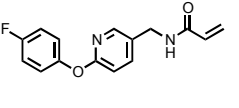   | <b>S1-19</b> | 272.27 | 0 | 0    |
|    | <b>S1-20</b> | 296.39 | 0 | 0    |
|    | <b>S1-21</b> | 273.29 | 0 | 20.2 |
|    | <b>S1-22</b> | 296.37 | 0 | 0    |
|   | <b>S1-23</b> | 296.36 | 0 | 21.4 |
|  | <b>S1-24</b> | 297.39 | 0 | 0    |
|  | <b>S1-25</b> | 265.74 | 0 | 0    |
|  | <b>S1-26</b> | 246.31 | 0 | 0    |
|  | <b>S1-27</b> | 272.34 | 0 | 20   |

**Table S3.** Percent modification of cys-light K-Ras<sup>G12C</sup> 1-169 and K-Ras<sup>WT</sup> 1-189 by compounds in Acrylamide Library

| Compound Structure                                                                  | Name            | Mass   | % Labeling of K-Ras <sup>G12C</sup> | % Labeling of K-Ras <sup>WT</sup> 1-189 |
|-------------------------------------------------------------------------------------|-----------------|--------|-------------------------------------|-----------------------------------------|
| 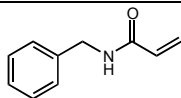   | <b>DKM-2-31</b> | 161.20 | 0                                   | 0                                       |
|   | <b>DKM-2-32</b> | 203.28 | 0                                   | 0                                       |
|  | <b>DKM-2-34</b> | 179.19 | 0                                   | 0                                       |
|  | <b>DKM-2-37</b> | 237.30 | 0                                   | 0                                       |
|  | <b>DKM-2-39</b> | 212.25 | 0                                   | 18.2                                    |
|  | <b>DKM-2-40</b> | 183.15 | 40.4                                | 100                                     |
|  | <b>DKM-2-43</b> | 240.10 | 0                                   | 0                                       |

|                                                                                     |                 |        |      |      |
|-------------------------------------------------------------------------------------|-----------------|--------|------|------|
| 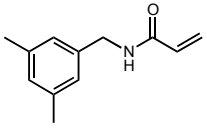   | <b>DKM-2-47</b> | 189.25 | 0    | 0    |
|    | <b>DKM-2-49</b> | 141.17 | 0    | 22.4 |
|    | <b>DKM-2-50</b> | 189.25 | 0    | 0    |
|    | <b>DKM-2-58</b> | 221.25 | 0    | 0    |
|   | <b>DKM-2-59</b> | 237.30 | 0    | 0    |
|  | <b>DKM-2-60</b> | 195.65 | 0    | 0    |
|  | <b>DKM-2-84</b> | 187.24 | 0    | 30.0 |
|  | <b>DKM-2-85</b> | 219.24 | 56.5 | 100  |
|  | <b>DKM-2-86</b> | 191.18 | 0    | 38.0 |
|  | <b>DKM-2-87</b> | 205.21 | 0    | 40.0 |
|  | <b>DKM-2-95</b> | 175.23 | 0    | 0    |

|                                                                                     |                  |        |      |      |
|-------------------------------------------------------------------------------------|------------------|--------|------|------|
| 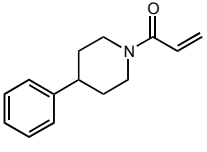   | <b>DKM-2-97</b>  | 215.29 | 0    | 0    |
|    | <b>DKM-2-98</b>  | 248.28 | 0    | 0    |
|    | <b>DKM-2-99</b>  | 111.14 | 0    | 0    |
|    | <b>DKM-2-100</b> | 184.24 | 0    | 0    |
|    | <b>DKM-2-101</b> | 173.21 | 41.7 | 100  |
|   | <b>DKM-2-102</b> | 127.18 | 0    | 0    |
|  | <b>DKM-2-103</b> | 143.18 | 0    | 0    |
|  | <b>DKM-2-104</b> | 192.17 | 100  | 100  |
|  | <b>DKM-2-107</b> | 181.62 | 0    | 31.0 |
|  | <b>DKM-2-108</b> | 139.19 | 0    | 0    |
|  | <b>DKM-2-109</b> | 169.22 | 0    | 0    |
|  | <b>DKM-2-110</b> | 221.25 | 0    | 0    |

|                                                                                     |                  |        |      |      |
|-------------------------------------------------------------------------------------|------------------|--------|------|------|
| 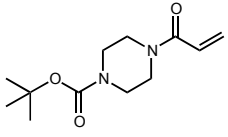   | <b>DKM-2-111</b> | 240.30 | 0    | 0    |
|    | <b>DKM-2-113</b> | 191.23 | 0    | 0    |
|    | <b>DKM-2-114</b> | 235.37 | 0    | 0    |
|    | <b>DKM-2-116</b> | 229.20 | 0    | 0    |
|   | <b>DKM-2-117</b> | 251.28 | 100  | 100  |
|  | <b>DKM-2-119</b> | 239.27 | 38.8 | 43   |
|  | <b>DKM-2-120</b> | 211.26 | 0    | 0    |
|  | <b>DKM3-3</b>    | 292.16 | 16.3 | 0    |
|  | <b>DKM-3-4</b>   | 237.30 | 0    | 0    |
|  | <b>DKM-3-5</b>   | 216.28 | 0    | 15.7 |



|                                                                                     |                 |        |    |      |
|-------------------------------------------------------------------------------------|-----------------|--------|----|------|
| 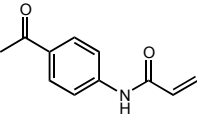   | <b>DKM-3-7</b>  | 189.21 | 53 | 100  |
|    | <b>DKM-3-8</b>  | 153.22 | 0  | 0    |
|    | <b>DKM-3-9</b>  | 187.24 | 0  | 0    |
|    | <b>DKM-3-10</b> | 193.27 | 0  | 62.5 |
|   | <b>DKM-3-12</b> | 144.21 | 0  | 0    |
|  | <b>DKM-3-15</b> | 155.19 | 0  | 0    |
|  | <b>DKM-3-16</b> | 251.32 | 0  | 0    |
|  | <b>DKM3-30</b>  | 273.71 | 0  | 0    |
|  | <b>DKM3-31</b>  | 165.16 | 0  | 41.6 |
|  | <b>DKM-3-32</b> | 127.18 | 0  | 0    |
|  | <b>DKM-3-36</b> | 246.30 | 0  | 19.3 |
|  | <b>DKM-3-41</b> | 313.39 | 0  | 0    |

|                                                                                     |                 |        |    |      |
|-------------------------------------------------------------------------------------|-----------------|--------|----|------|
| 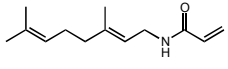   | <b>DKM-3-42</b> | 207.31 | 0  | 0    |
|    | <b>DKM-3-43</b> | 205.21 | 0  | 0    |
|    | <b>DKM3-70</b>  | 223.27 | 52 | 100  |
|    | <b>TRH-1-12</b> | 211.34 | 0  | 0    |
|    | <b>TRH-1-13</b> | 221.25 | 0  | 0    |
|   | <b>TRH-1-19</b> | 147.17 | 0  | 28.2 |
|  | <b>TRH-1-20</b> | 175.23 | 0  | 0    |
|  | <b>TRH-1-27</b> | 167.25 | 0  | 0    |
|  | <b>TRH-1-30</b> | 157.23 | 0  | 24.5 |
|  | <b>TRH-1-32</b> | 177.20 | 0  | 20.9 |

**Table S4.** Data collection and refinement statistics for K-Ras<sup>G12C</sup>-10 (PDB: 6ARK).

| <b>K-Ras<sup>G12C</sup>-10</b>       |                            |
|--------------------------------------|----------------------------|
| <b>Data Collection</b>               |                            |
| Space group                          | H 3 2                      |
| Cell Dimension                       |                            |
| <i>a, b, c</i> (Å)                   | 94.2799, 94.2799, 119.55   |
| <i>α, β, γ</i> (°)                   | 90, 90, 120                |
| Resolution range (Å)                 | 30.43 - 1.75 (1.78 - 1.75) |
| R <sub>merge</sub>                   | 0.072 (0.996)              |
| R <sub>pim</sub>                     | 0.033 (0.451)              |
| Mean I/σI                            | 13.60                      |
| CC1/2                                | 0.999 (0.702)              |
| Completeness (%)                     | 100.00 (100.00)            |
| Multiplicity                         | 2.0 (2.0)                  |
| <b>Refinement</b>                    |                            |
| Resolution (Å)                       | 29.88 - 1.75               |
| Reflections used in refinement       | 39968                      |
| R <sub>work</sub> /R <sub>free</sub> | 0.1937/0.2314              |
| Number of atoms                      | 1444                       |
| Protein                              | 1323                       |
| Ligands/ions                         | 65                         |
| Water                                | 56                         |
| B-factors                            | 52.59                      |
| Protein                              | 53.04                      |
| Ligands/ions                         | 52.11                      |
| Water                                | 42.50                      |
| R.m.s. deviations                    |                            |
| Bonds (Å)                            | 0.006                      |

|            |      |
|------------|------|
| Angles (°) | 0.98 |
|------------|------|

\*Statistics for the highest-resolution shell are shown in parentheses.

## Synthetic Methods

All commercial reagents were purchased and used without further purification. All reactions were done under argon in sealed vials with stirring. Silica gel chromatography was performed using a Combiflash Rf (Teledyne Isco) with pre-packed 4-24g silica columns and cartridges. All reverse-phase high performance liquid chromatography (RP-HPLC) was performed using a Waters 2545 solvent delivery system equipped with an XBridge prep C18 column. Separation was achieved using a gradient between 5-95% acetonitrile (ACN) in water with 0.1% formic acid by monitoring UV absorption ( $\lambda=254$  nm). For most compounds, high-resolution mass spectrometry (HRMS) was performed using a high-resolution UPLC/TOF system (Synapt G2-S, Waters) equipped with ESI source. Compounds were analyzed in positive ionization mode. Separation was done on Acquity BEH C18 column using water-methanol-formic acid gradient for elution. Elemental composition was determined using Elemental Composition module of MassLynx v.4.1 software. Liquid chromatography traces and MS (for S1-14 and S1-20) were collected with a Waters Acquity UPLC Class I/XEVO G2-XS QToF with a 2.1 x 50 mm Acquity UPLC BEH C18 column.  $^1\text{H}$  NMR were recorded on a Varian Innova 400 MHz or a Bruker DRX 500 MHz spectrometer.  $^1\text{H}$  chemical shifts are reported in  $\delta$  (ppm) as s (singlet), d (doublet), dd (doublet of doublets), t (triplet), q (quartet), or m (multiplet) and are referenced to the residual solvent peak. Coupling constants (J) are reported as Hertz.  $^{13}\text{C}$  NMR were recorded on a Bruker DRX 500 MHz spectrometer and the  $^{13}\text{C}$  chemical shifts are reported in  $\delta$  (ppm) and are referenced to the residual solvent peak.

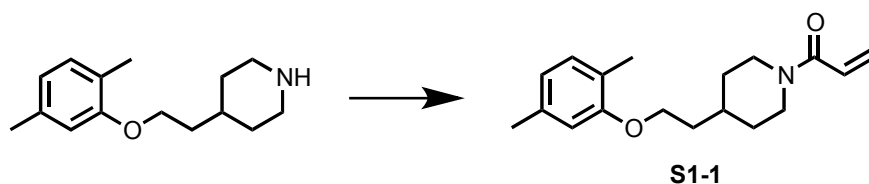

**S1-1** 1-(4-(2-(2,5-dimethylphenoxy)ethyl)piperidin-1-yl)prop-2-en-1-one:

4-(2-(2,5-Dimethylphenoxy)ethyl)piperidine hydrochloride (50mg, 1 eq, 0.19 mmol) was dissolved in 2mL acetonitrile. TEA was added (150uL, 6 eq, 1.11mmol) at ambient temperature. The reaction was cooled to 0°C. Acryloyl chloride (16uL, 1.1 eq, 0.20mmol) was added and reaction was stirred for 30 minutes. The reaction was extracted with ethyl acetate (5mL x 3), dried over Na<sub>2</sub>SO<sub>4</sub>. The compound was purified by flash chromatography on silica gel (0-15% dichloromethane: methanol gradient) and subsequently by RP-HPLC (45-95% gradient) to get the desired product the desired product (11.8mg, 22%yield) as a yellow oil. HRMS C<sub>18</sub>H<sub>26</sub>NO<sub>2</sub> [M+H]<sup>+</sup> expected mass: 288.1964; observed: 288.1972. <sup>1</sup>H NMR (400 MHz, CDCl<sub>3</sub>) δ 7.01 (d, J=7.54, 1H), 6.67 (d, J=7.52, 1H), 6.62 (s, 1H), 6.59 (dd, J=16.96, 10.60, 1H), 6.26 (dd, J=16.86, 1.97, 1H) 5.66 (dd, J=10.59, 1.97, 1H), 4.66 (d, J=12.70, 1H), 4.00 (t, J=6.21, 2H), 3.98 (m, 1H) 3.06 (t, J=12.71, 1H), 2.65(t, J=12.63, 1H) 2.31 (s, 3H), 2.17 (s, 3H), 1.84 (m, 3H), 1.77 (q, J=6.23, 2H), 1.23 (m, 2H).

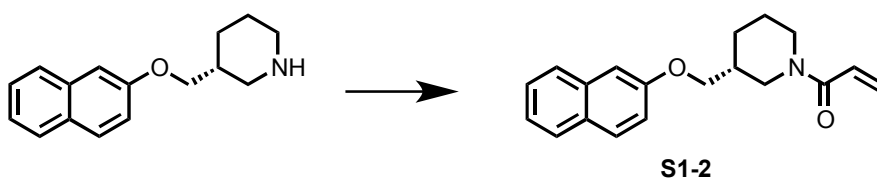

**S1-2** (R)-1-(3-((naphthalen-2-yloxy)methyl)piperidin-1-yl)prop-2-en-1-one:

3-[(2-Naphthoxy)methyl]piperidine (50mg, 1 eq, 0.18 mmol) was dissolved in 2mL acetonitrile. TEA was added (250uL, 5eq, 0.9mmol) at ambient temperature. The reaction was cooled to 0°C. Acryloyl chloride (30uL, 2 eq, 0.4mmol) was added and reaction was stirred for 30 minutes. The reaction was quenched with 5mL saturated NaHCO<sub>3</sub>. The reaction was extracted with ethyl acetate (5mL x 3), dried over Na<sub>2</sub>SO<sub>4</sub>. The compound was purified by flash chromatography on silica gel (5-100% hexanes: ethyl acetate gradient) to get the desired product (25mg, 47%yield) as a yellow oil. HRMS C<sub>19</sub>H<sub>22</sub>NO<sub>2</sub> [M+H]<sup>+</sup> expected mass: 296.1651; observed: 296.1664. <sup>1</sup>H NMR (400 MHz, CDCl<sub>3</sub>) δ 7.74 (m, 3H), 7.44 (m, 1H), 7.34 (m, 1H), 7.15 (d, J=8.92, 1H), 7.11 (s, 1H), 6.62 (m, 1H), 6.27 (t, J=16.37, 1H), 5.66 (dd, J=16.73, 10.79, 1H), 4.48 (dd, J=170.32, 13.47, 1H), 3.98 (m, 3H), 2.97 (m, 1H), 3.10 (m, 1H), 2.13 (m, 1H), 1.98 (m, 1H), 1.79 (m, 2H), 1.54 (m, 1H).

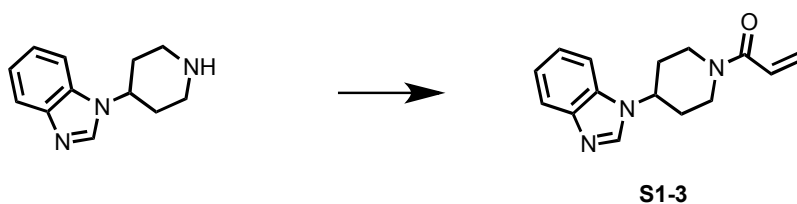

**S1-3** 1-(4-(1*H*-benzo[*d*]imidazol-1-yl)piperidin-1-yl)prop-2-en-1-one:

1-(piperidin-4-yl)-1*H*-1,3-benzodiazole hydrochloride (27mg, 1 eq, 0.13 mmol) was dissolved in 2mL acetonitrile. TEA was added (35uL, 1.9 eq, 0.247mmol) at ambient temperature. The reaction was cooled to 0°C. Acryloyl chloride (8uL, 0.8 eq, 0.1mmol) was added. The reaction was quenched with 5mL saturated NaHCO<sub>3</sub>. The reaction was extracted with ethyl acetate (5mL x 3), dried over Na<sub>2</sub>SO<sub>4</sub>. The compound was purified by flash chromatography on silica gel (0-15% dichloromethane: methanol) to get the desired product (15.7mg, 50%yield) as a white solid. HRMS C<sub>15</sub>H<sub>18</sub>N<sub>3</sub>O [M+H]<sup>+</sup> expected mass: 256.145; observed: 256.145. <sup>1</sup>H NMR (400 MHz, CD<sub>3</sub>OD) δ 8.28 (s, 1H), 7.71 (m, 2H), 7.30 (m, 2H), 6.84 (dd, J=16.56,10.64, 1H), 6.24 (dd, J=16.79, 2.02, 1H), 5.78 (dd, J=10.59, 2.02, 1H), 4.73 (m, 2H), 4.34 (d, J=13.41, 1H), 3.39 (t, J=13.41, 1H), 2.97 (t, J=13.41, 1H), 2.25 (d, J=12.49), 2.09 (m, 2H).

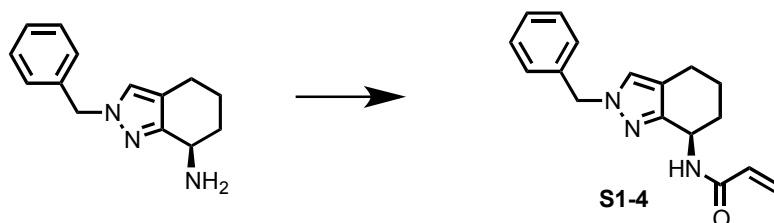

**S1-4** *N*-((2-(3,4-dihydroisoquinolin-2(1*H*)-yl)pyridin-3-yl)methyl)acrylamide:

1-benzyl-4,5,6,7-tetrahydro-1*H*-indazol-4-amine (75mg, 1 eq, 0.33mmol) was dissolved in 2mL acetonitrile. TEA was added (90uL, 2 eq, 0.66mmol) at ambient temperature. The reaction was cooled to 0°C. Acryloyl chloride (30uL, 1.1 eq, 0.36mmol) was added. The reaction was quenched with 5mL saturated NaHCO<sub>3</sub>. The reaction was extracted with ethyl acetate (5mL x 3), dried over Na<sub>2</sub>SO<sub>4</sub>. The compound was purified by flash chromatography on silica gel (5-100% hexanes: ethyl acetate) to get the desired product (7mg, 8%yield) as a yellow oil. HRMS C<sub>17</sub>H<sub>20</sub>N<sub>3</sub>O [M+H]<sup>+</sup> expected mass: 282.1606; observed: 282.1608. <sup>1</sup>H NMR (400 MHz, CD<sub>3</sub>OD) δ 7.40 (s, 1H), 7.29 (m, 3H), 7.12 (d, J=7.25, 2H), 5.65 (dd, J=6.88, 5.00, 1H), 6.25 (m, 2H), 5.26 (s, 2H), 5.04 (t, J=4.91, 1H), 2.55 (m, 2H), 1.93 (m, 2H), 1.82 (m, 1H), 1.70 (m, 1H).

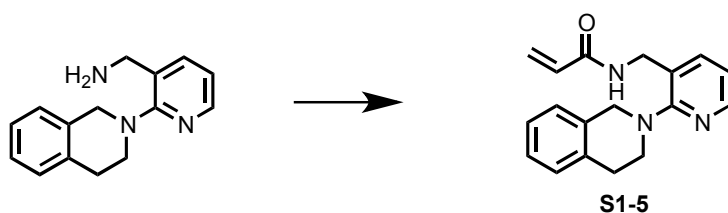

**S1-5** *N*-((2-(3,4-dihydroisoquinolin-2(1*H*)-yl)pyridin-3-yl)methyl)acrylamide:

(2-(3,4-Dihydroisoquinolin-2(1*H*)-yl)pyridin-3-yl)methanamine (50mg, 1 eq, 0.208mmol) was dissolved in 2mL acetonitrile. TEA was added (58uL, 2 eq, 0.416mmol) at ambient temperature. The reaction was cooled to 0°C. Acryloyl chloride (19uL, 1.1 eq, 0.229mmol) was added. The reaction was quenched with 5mL saturated NaHCO<sub>3</sub>. The reaction was extracted with ethyl acetate (5mL x 3), dried over Na<sub>2</sub>SO<sub>4</sub>. The compound was purified by flash chromatography on silica gel (5-100% hexanes: ethyl acetate) to get the desired product (8.2mg, 13%yield) as a white oily solid. HRMS C<sub>18</sub>H<sub>20</sub>N<sub>3</sub>O [M+H]<sup>+</sup> expected mass: 294.1606; observed: 294.1609. <sup>1</sup>H NMR (400 MHz, CDCl<sub>3</sub>) δ 8.29 (dd, J=4.87, 1.72, 1H), 7.59 (dd, J=7.49, 1.64, 1H), 7.19 (m, 3H), 7.15 (m, 1H), 6.99 (dd, J=4.92, 7.47, 1H), 6.42 (s, 1H), 6.26 (dd, J=16.98, 1.24, 1H), 6.05 (dd, J=17.00, 10.31, 1H), 5.63 (dd, J=10.31, 1.21, 1H), 4.64 (d, J=5.91, 2H), 4.39 (s, 2H), 3.40 (t, J=5.80, 2H), 3.07 (t, J=5.72, 2H). <sup>13</sup>C NMR (400 MHz, CDCl<sub>3</sub>) δ 165.78, 161.19, 147.05, 137.84, 134.91, 134.22, 130.71, 129.04, 127.01, 126.87, 126.55, 126.11, 125.41, 118.91, 77.39, 52.24, 49.62, 40.05, 29.84.

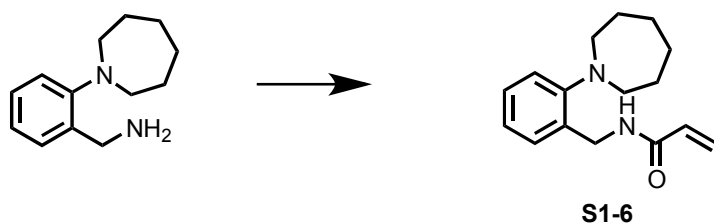

**S1-6** *N*-(2-(1-azepanyl)benzyl)acrylamide:

[2-(1-Azepanyl)phenyl]methanamine (61mg, 1 eq, 0.3mmol) was dissolved in 2mL acetonitrile. TEA (70uL, 2eq, 0.5mmol) was added at ambient temperature. The reaction was cooled to 0°C. Acryloyl chloride (22uL, 1.1 eq, 0.27mmol) was added. The reaction was quenched with 5mL saturated NaHCO<sub>3</sub> and left stirring for 15 minutes at ambient temperature. The reaction was extracted with ethyl acetate (5mL x 3), dried over Na<sub>2</sub>SO<sub>4</sub>. The compound was purified by flash chromatography on silica gel (5-100% hexanes: ethyl acetate) to get the desired product (32.8mg, 42%yield) a white oily solid. HRMS C<sub>16</sub>H<sub>23</sub>N<sub>2</sub>O [M+H]<sup>+</sup> expected mass: 259.181; observed: 259.1819. <sup>1</sup>H NMR (400 MHz, CDCl<sub>3</sub>) δ 7.24 (m, 2H), 7.16 (d, J=8.13, 1H), 7.03 (t, J=7.04, 1H), 6.97 (s, 1H), 6.29 (dd, J=16.96, 1.25, 1H), 6.10 (dd, J=16.92, 10.25, 1H), 5.64 (dd, J=10.23, 1.24, 1H), 4.61 (d, J=5.51, 2H), 3.10 (t, J=5.31, 4H), 1.73 (m, 8H).

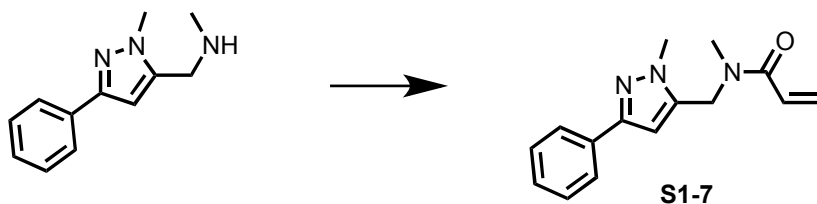

**S1-7** *N*-methyl-*N*-((1-methyl-3-phenyl-1*H*-pyrazol-5-yl)methyl)acrylamide:

*N*-methyl-1-(1-methyl-3-phenyl-1*H*-pyrazol-5-yl)methanamine (25mg, 1 eq, 0.124mmol) was dissolved in 2mL acetonitrile. TEA (35uL, 2 eq, 0.25mmol) was added at ambient temperature. The reaction was cooled to 0°C. Acryloyl chloride (11uL, 1.1 eq, 0.136mmol) was added. The reaction was quenched with 5mL saturated NaHCO<sub>3</sub> and left stirring for 15 minutes at ambient temperature. The reaction was extracted with ethyl acetate (5mL x 3), dried over Na<sub>2</sub>SO<sub>4</sub>. The compound was purified by flash chromatography on silica gel (5-100% hexanes: ethyl acetate) to get the desired product (17.6mg, 56% yield) as a white oily solid. HRMS C<sub>15</sub>H<sub>18</sub>N<sub>3</sub>O [M+H]<sup>+</sup> expected mass: 256.145; observed: 256.1458. <sup>1</sup>H NMR (400 MHz, CDCl<sub>3</sub>) δ 7.76 (d, J=7.62, 2H), 7.38 (t, J=7.44, 2H), 7.30 (d, J=7.44, 1H), 6.61 (dd, J=10.40, 16.78, 1H), 6.50 (s, 1H) 6.40 (dd, J=16.78, 1.95, 1H), 5.77(d, J=10.69, 1H), 4.75 (s, 2H), 3.89 (s, 3H), 3.05 (s, 3H).

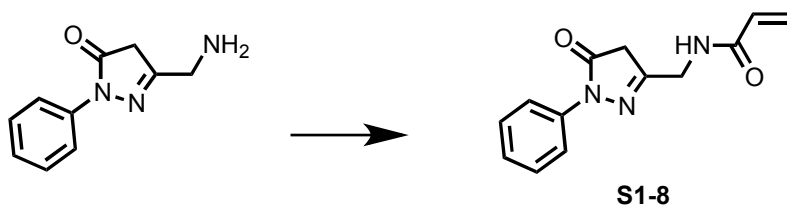

**S1-8** *N*-((5-oxo-1-phenyl-4,5-dihydro-1*H*-pyrazol-3-yl)methyl)acrylamide:

5-(Aminomethyl)-2-phenyl-1,2-dihydro-3*H*-pyrazol-3-one dihydrochloride (25mg, 1 eq, 0.13mmol) was dissolved in 2mL acetonitrile. TEA (37uL, 2eq, 0.26mmol) was added at ambient temperature. The reaction was cooled to 0°C. Acryloyl chloride (12uL, 1.1 eq, 0.15mmol) was added. The reaction was quenched with 5mL saturated NaHCO<sub>3</sub> and left stirring for 15 minutes at ambient temperature. The reaction was extracted with ethyl acetate (5mL x 3), dried over Na<sub>2</sub>SO<sub>4</sub>. The compound was purified by flash chromatography on silica gel (5-100% hexanes: ethyl acetate) to get the desired product (3mg, 9%yield) as a yellow oil. HRMS C<sub>13</sub>H<sub>14</sub>N<sub>3</sub>O<sub>2</sub> [M+H]<sup>+</sup> expected mass: 244.1086; observed: 244.1089. <sup>1</sup>H NMR (400 MHz, MeOD) δ 7.66 (t, J=7.70, 2H), 7.44 (t, J=7.70, 2H), 7.29 (t, J=7.69, 1H), 6.29 (m, 2H), 5.69 (dd, J= 8.35, 3.65, 1H), 4.37 (s, 2H).



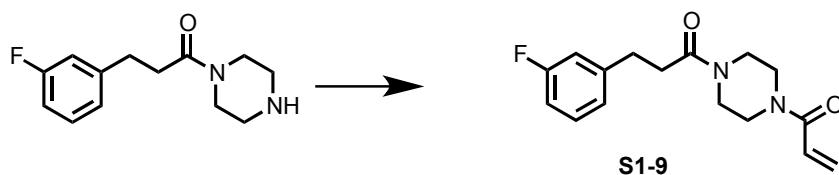

**S1-9** 1-(4-(3-(3-fluorophenyl)propanoyl)piperazin-1-yl)prop-2-en-1-one:

3-(3-Fluorophenyl)-1-(piperazin-1-yl)propan-1-one hydrochloride (25mg, 1 eq, 0.11mmol) was dissolved in 2mL acetonitrile. TEA (30uL, 2eq, 0.21mmol) was added at ambient temperature. The reaction was cooled to 0°C. Acryloyl chloride (10uL, 1.1 eq, 0.11mmol) was added. The reaction was quenched with 5mL saturated NaHCO<sub>3</sub> and left stirring for 15 minutes at ambient temperature. The reaction was extracted with ethyl acetate (5mL x 3), dried over Na<sub>2</sub>SO<sub>4</sub>. The compound was purified by flash chromatography on silica gel (5-100% hexanes: ethyl acetate) to get the desired product (12.8mg, 40%yield) as a clear oil. HRMS C<sub>16</sub>H<sub>20</sub>FN<sub>2</sub>O<sub>2</sub> [M+H]<sup>+</sup> expected mass: 291.1509; observed: 291.1509. <sup>1</sup>H NMR (400 MHz, CDCl<sub>3</sub>) δ 7.25 (m, 1H), 7.00 (d, J=7.61, 1H), 6.90 (m, 2H), 6.53 (m, 1H), 6.32 (dd, J=16.97, 1.70, 1H), 5.74 (dd, J=10.56, 1.57, 1H), 3.55 (m, 8H), 2.99 (t, J=7.40, 2H), 2.64 (t, J=7.40, 2H). <sup>13</sup>C NMR (500 MHz, CDCl<sub>3</sub>) δ 170.78, 165.74 + 164.02 (d, J=214.72), 162.06, 143.67, 130.19 + 130.12 (d, J=8.32), 129.00, 127.06, 124.28, 115.56 + 115.39 (d, J=21.09), 113.45 + 113.28 (d, J=21.09), 45.60, 45.25, 41.79, 41.44, 34.68, 31.13.

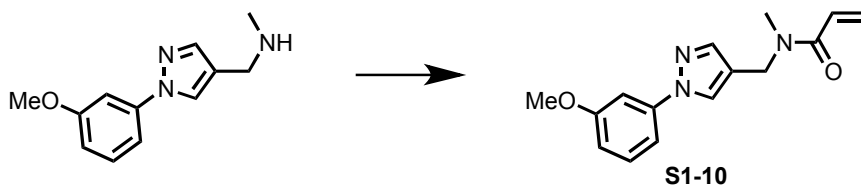

**S1-10** N-((1-(3-methoxyphenyl)-1H-pyrazol-4-yl)methyl)-N-methylacrylamide:

1-[1-(3-methoxyphenyl)-1H-pyrazol-4-yl]-N-methylmethanamine (57.6mg, 1 eq, 0.229mmol) was dissolved in 2mL acetonitrile. TEA (64uL, 2eq, 0.458mmol) was added at ambient temperature. The reaction was cooled to 0°C. Acryloyl chloride (20uL, 1.1 eq, 0.252mmol) was added. The reaction was quenched with 5mL saturated NaHCO<sub>3</sub> and left stirring for 15 minutes at ambient temperature. The reaction was extracted with ethyl acetate (5mL x 3), dried over Na<sub>2</sub>SO<sub>4</sub>. The compound was purified by flash chromatography on silica gel (5-100% hexanes: ethyl acetate) to get the desired product (29.6mg, 48%yield) as a clear oil. HRMS C<sub>15</sub>H<sub>18</sub>N<sub>3</sub>O<sub>2</sub> [M+H]<sup>+</sup> expected mass: 272.1399; observed: 272.1404. <sup>1</sup>H NMR (400 MHz, CDCl<sub>3</sub>) δ 7.32 (t, J=8.06, 1H), 7.20 (d, J=8.06, 1H), 6.82 (d, J=8.06, 1H), 6.58 (dd, J=16.83, 10.27, 1H), 6.37 (dd, J=16.74, 1.78, 1H), 5.73 (dd, J=10.40, 1.68, 1H), 4.54 (s, 2H), 3.86 (s, 3H), 3.07 (s, 3H).

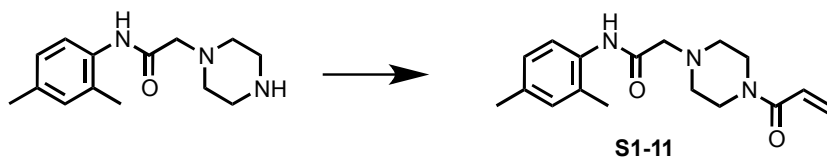

**S1-11** 2-(4-acryloylpiperazin-1-yl)-*N*-(2,4-dimethylphenyl)acetamide:

*N*-(2,4-dimethylphenyl)-2-piperazin-1-yl-acetamide (25mg, 1 eq, 0.10mmol) was dissolved in 2mL acetonitrile. TEA (28uL, 2eq, 0.20mmol) was added at ambient temperature. The reaction was cooled to 0°C. Acryloyl chloride (9uL, 1.1 eq, 0.11mmol) was added. The reaction was quenched with 5mL saturated NaHCO<sub>3</sub> and left stirring for 15 minutes at ambient temperature. The reaction was extracted with ethyl acetate (5mL x 3), dried over Na<sub>2</sub>SO<sub>4</sub>. The compound was purified by flash chromatography on silica gel (0-15% dichloromethane: methanol) to get the desired product (9mg, 30% yield) a white solid. HRMS C<sub>17</sub>H<sub>24</sub>N<sub>3</sub>O<sub>2</sub> [M+H]<sup>+</sup> expected mass: 302.1869; observed: 302.1874. <sup>1</sup>H NMR (400 MHz, CDCl<sub>3</sub>) δ 9.06 (s, 1H) 7.94 (s, 1H), 7.06 (d, J=7.59, 1H), 6.88 (d, J=7.70, 1H), 6.56 (dd, J=17.09, 10.61, 1H), 6.31 (dd, J=17.05, 1.97, 1H), 5.73 (dd, J=10.68, 1.97, 1H), 3.76 (s, 2H), 3.65 (s, 2H), 3.22 (s, 2H), 2.68 (t, J=5.09, 4H), 2.33 (s, 3H), 2.24 (s, 3H). <sup>13</sup>C NMR (500 MHz, CDCl<sub>3</sub>) δ 167.41, 165.65, 137.04, 135.43, 130.32, 128.66, 127.23, 125.49, 123.89, 121.77, 62.21, 53.73, 53.27, 46.04, 42.26, 21.39, 17.50

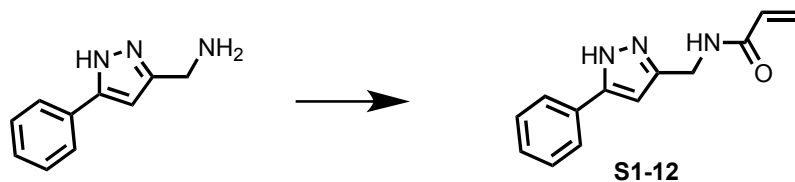

**S1-12** *N*-((5-phenyl-1*H*-pyrazol-3-yl)methyl)acrylamide:

(3-phenyl-1*H*-pyrazol-5-yl)methanamine (50mg, 1eq, 0.287mmol) was dissolved in 2mL acetonitrile. TEA (80uL, 2eq, 0.574mmol) was added at ambient temperature. The reaction was cooled to 0°C. Acryloyl chloride (25uL, 1.1 eq, 0.316mmol) was added. The reaction was quenched with 5mL saturated NaHCO<sub>3</sub> and left stirring for 15 minutes at ambient temperature. The reaction was extracted with ethyl acetate (5mL x 3), dried over Na<sub>2</sub>SO<sub>4</sub>. The compound was purified by flash chromatography on silica gel (0-15% dichloromethane: methanol) and RP-HPLC (35-70% gradient) to get the desired product (13mg, 20% yield) as a white powder. HRMS C<sub>13</sub>H<sub>14</sub>N<sub>3</sub>O [M+H]<sup>+</sup> expected mass: 228.1137; observed: 228.1145. <sup>1</sup>H NMR (400 MHz, MeOD) δ 7.69 (s, 2H), 7.41 (t, J=6.96, 2H), 7.32 (t, J=6.89, 1H), 6.57 (s, 1H), 6.28 (m, 2H), 5.69 (dd, J=7.84, 4.24, 1H), 4.50 (s, 2H).

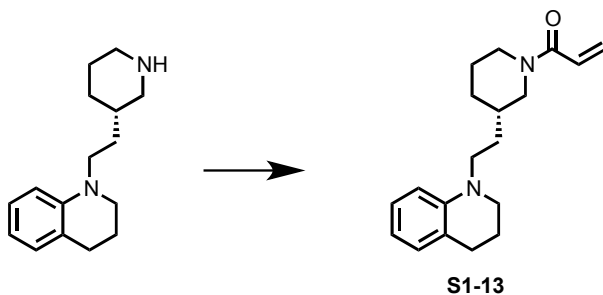

**S1-13** (*S*)-1-(3-(2-(3,4-dihydroquinolin-1(2*H*)-yl)ethyl)piperidin-1-yl)prop-2-en-1-one:

(*S*)-1-(2-(piperidin-3-yl)ethyl)-1,2,3,4-tetrahydroquinoline (63.8mg, 1 eq, 0.227mmol) was dissolved in 2mL acetonitrile. TEA (57uL, 2eq, 0.408mmol) was added at ambient temperature. The reaction was cooled to 0°C. Acryloyl chloride (18uL, 1 eq, 0.224 mmol) was added. The reaction was quenched with 5mL saturated NaHCO<sub>3</sub> and left stirring for 15 minutes at ambient temperature. The reaction was extracted with ethyl acetate (5mL x 3), dried over Na<sub>2</sub>SO<sub>4</sub>. The compound was purified by flash chromatography on silica gel (5-95% hexanes: ethyl acetate), followed by RP-HPLC (45-95% gradient) to get the desired product (2.1mg, 3% yield) as an orange solid. HRMS C<sub>19</sub>H<sub>27</sub>N<sub>2</sub>O [M+H]<sup>+</sup> expected mass: 299.2123; observed: 299.2125. <sup>1</sup>H NMR (400 MHz, CDCl<sub>3</sub>) δ 7.03 (m, 1H), 6.93 (m, 1H), 6.55 (m, 3H), 6.25 (d, J=16.94, 1H), 5.65 (t, J=9.53, 1H), 4.45 (dd, J=31.77, 12.64, 1H), 3.87 (d, J=12.64, 1H), 3.32 (t, J=6.24, 2H), 3.26 (m, 2H), 3.08 (t, J=12.11, 1H), 2.83 (t, J=12.96, 1H), 2.74 (t, J=6.24, 2H), 2.54 (t, J=10.80, 1H), 1.94 (m, 3H), 1.75 (d, J=13.57, 1H), 1.47 (m, 3H), 1.26 (m, 1H).

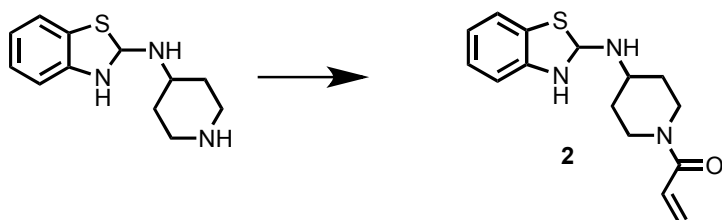

**2** 1-(4-(benzo[*d*]thiazol-2-ylamino)piperidin-1-yl)prop-2-en-1-one:

*N*-(piperidin-4-yl)benzo[*d*]thiazol-2-amine (58mg, 1 eq, 0.213 mmol) was dissolved in 2mL acetonitrile at ambient temperature. TEA (60uL, 2eq, 0.427mmol) was added at ambient temperature. The reaction was cooled to 0°C. Acryloyl chloride (19uL, 1.1 eq, 0.235mmol) was added. The reaction was quenched with 5mL saturated NaHCO<sub>3</sub> and left stirring for 15 minutes at ambient temperature. The reaction was extracted with ethyl acetate (5mL x 3), dried over Na<sub>2</sub>SO<sub>4</sub>. The compound was purified by flash chromatography on silica gel (0-15% dichloromethane: methanol) to get the desired product (7mg, 11%yield) as a yellow oil.

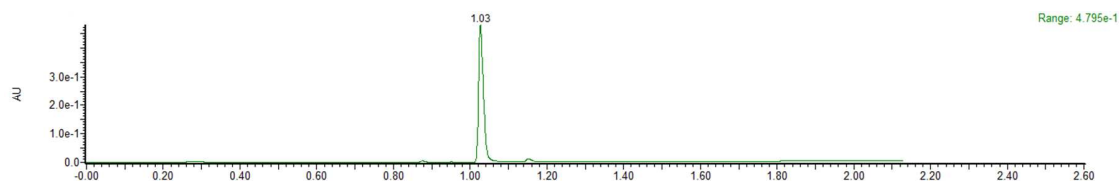

HRMS  $C_{15}H_{18}N_3OS$   $[M+H]^+$  expected mass: 288.1171; observed: 288.1176.  $^1H$  NMR (400 MHz,  $CDCl_3$ )  $\delta$  7.58 (d,  $J=8.06$ , 1H), 7.54 (d,  $J=8.08$ , 1H), 7.30 (t,  $J=8.07$ , 1H), 7.10 (t,  $J=7.75$ , 1H), 5.17 (s, 1H), 4.58 (s, 1H), 4.00 (s, 2H), 3.27 (t,  $J=12.29$ , 1H), 2.97 (t,  $J=11.96$ , 1H), 2.23 (m, 2H), 1.63 (s, 2H), 1.49 (s, 2H).  $^{13}C$  NMR (500 MHz,  $CDCl_3$ )  $\delta$  165.63, 165.61, 152.44, 130.53, 128.25, 127.62, 126.16, 122.04, 120.94, 119.22, 52.16, 44.66, 41.02, 33.07, 32.08.

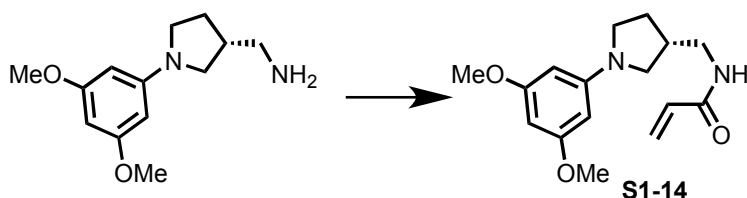

**S1-14** (*R*)-*N*-((1-(3,5-dimethoxyphenyl)pyrrolidin-3-yl)methyl)acrylamide:

1-Ethyl-3-(3-dimethylaminopropyl)carbodiimide (11mg, 1.4eq, 0.7mmol) was dissolved in 1mL dimethylformamide at ambient temperature. The reaction was cooled to 0°C. DIPEA (44uL, 5 eq, 0.25mmol), and then hydroxybenzotriazole (11mg, 1.4eq, 0.7mmol) was added. Acrylic acid (5uL, 1.4eq, 0.7mmol) was added to the reaction, and was stirred for 30 minutes. (*R*)-(1-(3,5-dimethoxyphenyl)pyrrolidin-3-yl)methanamine (12mg, 1 eq, 0.051mmol) was added at 0°C. The reaction was washed with 5mL saturated NaCl. The product was extracted with ethyl acetate (5mL x 3) and dried over  $Na_2SO_4$ . The compound was purified by flash chromatography on silica gel (5-100% hexanes: ethyl acetate) to get the desired product (2.3mg, 16% yield) as a yellow oil. MS  $C_{16}H_{22}N_2O_3$   $[M+H]^+$  expected: 291.1703, observed: 291.1732.  $^1H$  NMR (400 MHz,  $CDCl_3$ )  $\delta$  6.30 (d,  $J=16.73$ , 1H), 6.09 (dd,  $J=16.54, 9.73$ , 1H), 5.89 (m, 1H), 5.74 (d,  $J=1.95$ , 2H), 5.67 (d,  $J=9.73$ , 1H), 3.78 (s, 6H), 3.40 (m, 4), 3.28 (m, 1H), 3.04 (m, 1H), 2.59 (m, 1H), 2.29 (m, 1H), 1.78 (m, 1H).

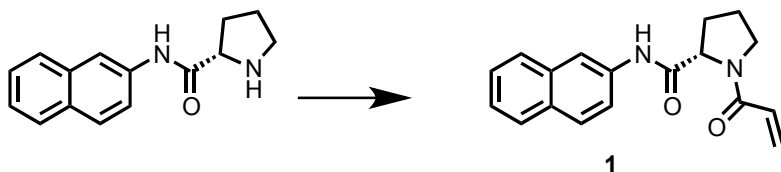

**1** (1*R*)-2-acryloyl-*N*-(naphthalen-2-yl)cyclopentanecarboxamide:

L-Proline-2-naphthylamide hydrochloride (55.5mg, 1 eq, 0.20mmol) was dissolved in 2mL acetonitrile. TEA (58uL, 2eq, 0.414mmol) was added at ambient temperature. The reaction

was cooled to 0°C. Acryloyl chloride (19uL, 1.1 eq, 0.228mmol) was added. The reaction was quenched with 5mL saturated NaHCO<sub>3</sub> and left stirring for 15 minutes at ambient temperature. The reaction was extracted with ethyl acetate (5mL x 3), dried over Na<sub>2</sub>SO<sub>4</sub>. The compound was purified by flash chromatography on silica gel (5-95% hexanes: ethyl acetate) to get the desired product (39.4mg, 67%yield) as a white, crystalline solid.

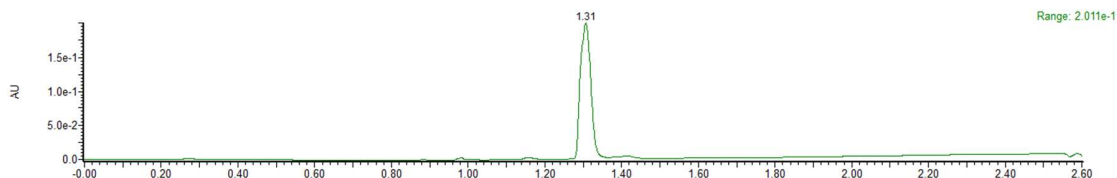

HRMS C<sub>18</sub>H<sub>18</sub>N<sub>2</sub>O<sub>2</sub>Na [M+Na]<sup>+</sup> expected mass: 317.1266; observed: 317.1271. <sup>1</sup>H NMR (500MHz, CDCl<sub>3</sub>) δ 10.02 (s, 1H), 8.23 (s, 1H), 7.73 (m, 3H), 7.45 (dd, J=8.82, 1.98, 1H), 7.41 (t, J=7.39, 1H), 7.35 (t, J=7.52, 1H), 6.52 (d, J=6.38, 2H), 5.82 (t, J=6.31, 1H), 4.94 (d, J=7.67, 1H), 3.72 (t, J=9.60, 1H), 3.57 (m, 1H), 2.66 (dd, J=12.48, 6.56, 1H), 2.22 (m, 1H), 2.09 (m, 1H), 1.88 (m, 1H). <sup>13</sup>C NMR (500MHz, CDCl<sub>3</sub>) δ 169.06, 166.74, 135.92, 133.97, 130.57, 129.63, 128.62, 127.99, 127.74, 127.57, 126.37, 124.80, 120.21, 116.39, 60.99, 47.82, 26.54, 25.21.

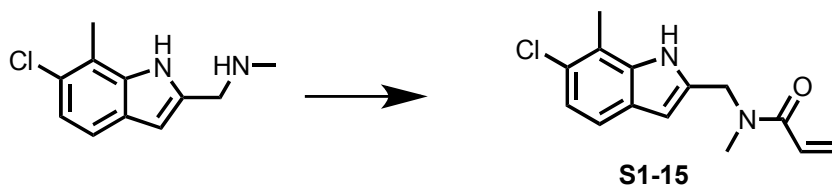

**S1-15** *N*-((6-chloro-7-methyl-1*H*-indol-2-yl)methyl)-*N*-methylacrylamide:

6-chloro-2-methyl-1*H*-indol-2-yl methyl methylamine (50mg, 1eq, 0.24 mmol) was dissolved in 2mL acetonitrile. TEA was added (67uL, 2eq, 0.48mmol) was added at ambient temperature. The reaction was cooled to 0°C. Acryloyl chloride (21uL, 1.1 eq, 0.26mmol) was added. The reaction was quenched with 5mL saturated NaHCO<sub>3</sub> and left stirring for 15 minutes at ambient temperature. The reaction was extracted with ethyl acetate (5mL x 3), dried over Na<sub>2</sub>SO<sub>4</sub>. The compound was purified by flash chromatography on silica gel (5-100% hexanes: ethyl acetate) to get the desired product (14.1mg, 22%yield), as an orange oil. HRMS C<sub>14</sub>H<sub>15</sub>ClN<sub>2</sub>O<sub>2</sub>Na [M+Na]<sup>+</sup> expected mass: 285.0771; observed: 285.0776. <sup>1</sup>H NMR (400 MHz, CDCl<sub>3</sub>) δ 7.31 (d, J=8.45, 1H) 7.08 (d, J=8.49, 1H) 6.57 (dd, J=16.73, 10.30, 1H), 6.41 (dd, J=16.73, 1.93, 1H), 6.38 (d, J = 2.11, 1H), 5.77 (dd, J=10.45, 1.83, 1H), 4.60 (s, 2H) 3.10 (s, 3H), 2.49 (s, 3H).

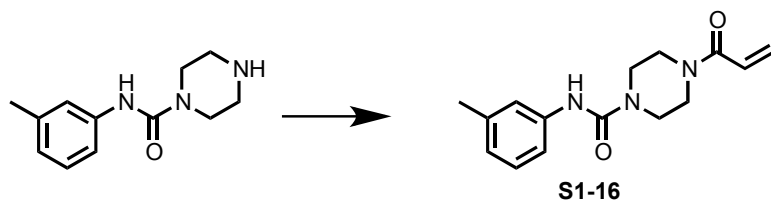

**S1-16** 4-acryloyl-*N*-(*m*-tolyl)piperazine-1-carboxamide:

*N*-(*m*-tolyl)piperazine-1-carboxamide (35.6mg, 1 eq, 0.162 mmol) was dissolved in 2mL ACN. TEA was added (45uL, 2 eq, 0.324 mmol). The reaction was cooled to 0°C. Acryloyl chloride (13uL, 1 eq, 0.162 mmol) was added. The reaction was quenched with 5mL saturated NaHCO<sub>3</sub> and left stirring for 15 minutes at ambient temperature. The reaction was extracted with ethyl acetate (5mL x 3), dried over Na<sub>2</sub>SO<sub>4</sub>. The compound was purified twice by flash chromatography on silica gel (5-100% hexanes: ethyl acetate (to get the desired product (3.7mg, 8% yield) as a yellow powder. HRMS C<sub>15</sub>H<sub>20</sub>N<sub>3</sub>O<sub>2</sub> [M+H]<sup>+</sup> expected mass: 274.1556; observed: 274.1563. <sup>1</sup>H NMR (500 MHz, CDCl<sub>3</sub>) δ 7.21 (s, 1H), 7.18 (t, J=7.88, 1H), 7.11 (d, J=8.00, 1H), 6.88 (d, J=7.70, 1H), 6.57 (dd, J=16.79, 10.37, 1H), 6.35 (dd, J=16.85, 1.86), 6.34 (s, 1H), 5.76 (dd, J=10.53, 1.83, 1H), 3.64 (m, 8H), 2.33 (s, 3H). <sup>13</sup>C NMR (500 MHz, CDCl<sub>3</sub>) δ 167.72, 157.91, 140.58, 139.48, 129.47, 128.96, 128.76, 125.03, 122.82, 119.30, 46.70, 45.19, 44.93, 43.00, 21.55.

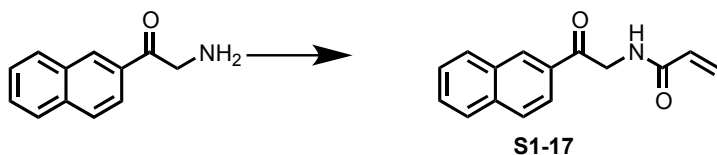

**S1-17** *N*-(2-(naphthalen-2-yl)-2-oxoethyl)acrylamide:

2-(naphthalen-2-yl)-2-oxoethanamine chloride (25.3mg, 1 eq, 0.114 mmol) was dissolved in 2mL ACN. TEA was added (32uL, 2 eq, 0.228 mmol). The reaction was cooled to 0°C. Acryloyl chloride (9uL, 1 eq, 0.114 mmol) was added. The reaction was quenched with 5mL saturated NaHCO<sub>3</sub> and left stirring for 15 minutes at ambient temperature. The reaction was extracted with ethyl acetate (5mL x 3), dried over Na<sub>2</sub>SO<sub>4</sub>. The compound was purified by flash chromatography on silica gel (5-100% hexanes: ethyl acetate), followed by RP-HPLC (25-90% gradient) to get the desired product (3.7mg, 14% yield) as a white solid. HRMS C<sub>15</sub>H<sub>14</sub>NO<sub>2</sub> [M+H]<sup>+</sup> expected mass: 240.1025; observed: 240.1029. <sup>1</sup>H NMR (500 MHz, CDCl<sub>3</sub>) δ 8.80 (d, J=8.66, 1H), 8.08 (d, J=8.23, 1H), 8.04 (d, J=7.35, 1H), 7.90 (d, J=8.23, 1H), 7.65 (t, J=7.66, 1H), 7.58 (t, J=7.58, 1H), 7.54 (d, J=7.66, 1H), 6.78 (s, 1H), 6.39 (dd, J=17.15, 1.48, 1H), 6.29 (dd, J=17.02, 10.12, 1H), 5.75 (dd, J=10.18, 1.38, 1H), 4.91 (s, 2H).

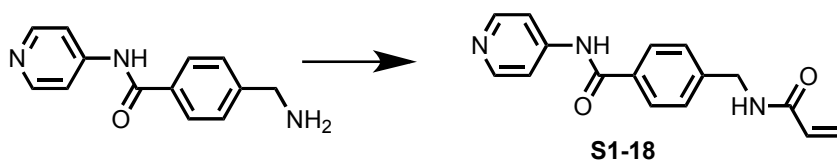

**S1-18** 4-(acrylamidomethyl)-*N*-(pyridin-4-yl)benzamide:

(4-(pyridin-4-ylcarbamoyl)phenyl)methanamine hydrochloride (25.6mg, 1 eq, 0.085 mmol) was dissolved in 2mL acetonitrile. TEA was added (75  $\mu$ L, 6 eq, 0.51 mmol). The reaction was cooled to 0°C. Acryloyl chloride (7 $\mu$ L, 1 eq, 0.085mmol) was added. The reaction was quenched with 5mL saturated NaHCO<sub>3</sub> and left stirring for 15 minutes at ambient temperature. The reaction was extracted with ethyl acetate (5mL x 3), dried over Na<sub>2</sub>SO<sub>4</sub>. The compound was purified by flash chromatography on silica gel (0-15% dichloromethane: methanol) followed by RP-HPLC with a gradient of 25-90% to get the desired product (1.1mg, 5% yield) as a white solid. HRMS C<sub>16</sub>H<sub>16</sub>N<sub>3</sub>O<sub>2</sub> [M+H]<sup>+</sup> expected mass: 282.1243; observed: 282.1235. <sup>1</sup>H NMR (500MHz, CD<sub>3</sub>OD)  $\delta$  8.44 (d, J = 6.3, 2H), 7.94(d, J=8.45, 2H), 7.84 (d, J=6.3, 2H), 6.32 (dd, J = 17.19, 9.16, 1H) 6.27 (dd, J = 17.19, 2.87, 1H), 5.71 (dd, J = 9.20, 2.83), 4.54 (s, 2H).

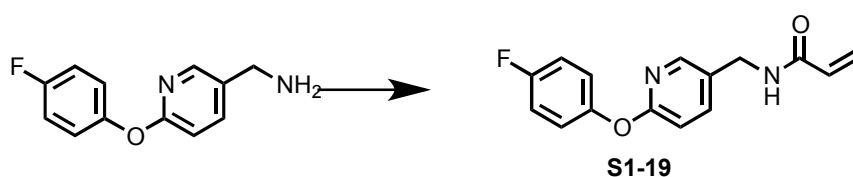

**S1-19** *N*-((6-(4-fluorophenoxy)pyridin-3-yl)methyl)acrylamide:

(6-(4-fluorophenoxy)pyridin-3-yl)methanamine hydrochloride (23.0mg, 1 eq, 0.105 mmol) was dissolved in 2mL ACN. TEA was added (29 $\mu$ L, 2 eq, 0.211 mmol). The reaction was cooled to 0°C. Acryloyl chloride (9 $\mu$ L, 1 eq, 0.105 mmol) was added. The reaction was quenched with 5mL saturated NaHCO<sub>3</sub> and left stirring for 15 minutes at ambient temperature. The reaction was extracted with ethyl acetate (5mL x 3), dried over Na<sub>2</sub>SO<sub>4</sub>. The compound was purified by flash chromatography on silica gel (5-100% hexanes: ethyl acetate), followed by RP-HPLC (25-90% gradient) to get the desired product (0.8 mg, 3% yield), as an opaque oil. HRMS C<sub>15</sub>H<sub>14</sub>FN<sub>2</sub>O<sub>2</sub> [M+H]<sup>+</sup> expected mass: 273.1039; observed: 273.1039. <sup>1</sup>H NMR (400 MHz, CDCl<sub>3</sub>)  $\delta$  8.09 (d, J=2.52, 1H), 7.69 (dd, J=8.47, 2.52, 1H), 6.89 (d, J=8.47), 7.08 (d, J=6.47, 4H), 6.33 (dd, J=16.99, 1.20, 1H), 6.09 (dd, J=16.99, 10.26, 1H), 5.81 (s, 1H), 5.70 (dd, J=10.38, 1.21), 4.49 (s, 1H), 4.47 (s, 1H).

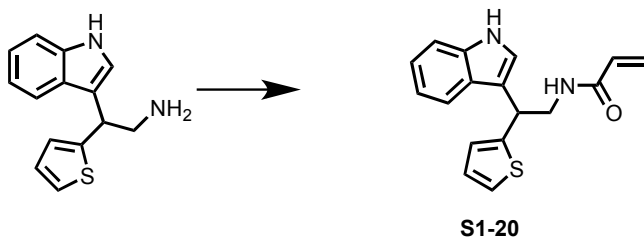

**S1-20** *N*-(2-(1*H*-indol-3-yl)-2-(thiophen-2-yl)ethyl)acrylamide:

2-(1*H*-indol-3-yl)-2-(thiophen-2-yl)ethanamine (25.1mg, 1 eq, 0.104 mmol) was dissolved in 2mL ACN. TEA was added (30uL, 2 eq, 0.208 mmol). The reaction was cooled to 0°C. Acryloyl chloride (8uL, 1 eq, 0.104 mmol) was added. The reaction was quenched with 5mL saturated NaHCO<sub>3</sub> and left stirring for 15 minutes at ambient temperature. The reaction was extracted with ethyl acetate (5mL x 3), dried over Na<sub>2</sub>SO<sub>4</sub>. The compound was purified by flash chromatography on silica gel (5-100% hexanes:EtOAC), followed by RP-HPLC (25-90% gradient) to get the desired product (4.7mg, 15% yield) as an opaque oil. HRMS C<sub>17</sub>H<sub>16</sub>N<sub>2</sub>OS [M-H]<sup>-</sup> expected mass: 295.0911, observed: 295.0901. <sup>1</sup>H NMR (500 MHz, CDCl<sub>3</sub>) δ 7.57 (d, J=8, 1H), 7.38 (d, J=8.07, 1H), 7.21 (t, J=7.62, 1H), 7.18 (m, 1H), 7.13 (d, J=2.37, 1H), 7.09 (t, J=7.62, 1H), 6.96 (m, 2H), 4.77 (t, J= 7.22, 1H), 4.14 (m, 1H), 3.97 (m, 1H). <sup>13</sup>C NMR (500 MHz, CDCl<sub>3</sub>) δ 165.63, 146.15, 136.59, 130.86, 126.95, 126.84, 126.53, 124.93, 124.22, 122.62, 122.04, 119.93, 119.57, 116.70, 111.43, 45.03, 38.29.

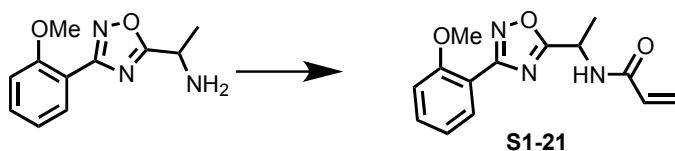

**S1-21** *N*-(1-[3-(2-methoxyphenyl)-1,2,4-oxadiazol-5-yl]ethyl)acrylamide:

1-[3-(2-methoxyphenyl)-1,2,4-oxadiazol-5-yl]ethan-1-amine hydrochloride (26.8mg, 1 eq, 0.105 mmol) was dissolved in 2mL ACN. TEA was added (30uL, 2 eq, 0.21 mmol). The reaction was cooled to 0°C. Acryloyl chloride (9uL, 1 eq, 0.105 mmol) was added. The reaction was quenched with 5mL saturated NaHCO<sub>3</sub> and left stirring for 15 minutes at ambient temperature. The reaction was extracted with ethyl acetate (5mL x 3), dried over Na<sub>2</sub>SO<sub>4</sub>. The compound was purified by flash chromatography on silica gel (5-100% hexanes:EtOAC), followed by RP-HPLC (25-90% gradient) to get the desired product (5.1mg, 20% yield), as an opaque oil. HRMS C<sub>14</sub>H<sub>16</sub>N<sub>3</sub>O<sub>3</sub> [M+H]<sup>+</sup> expected mass: 274.1192; observed: 274.1198. <sup>1</sup>H NMR (500 MHz, CDCl<sub>3</sub>) δ 7.97 (dd, J=7.68, 1.76, 1H), 7.49 (m, 1H), 7.07 (dd, 7.69, 14.81, 1H), 6.37 (dd, J=17.05, 1.05, 1H), 6.18 (dd, J=17.00, 10.38, 1H), 5.74 (J=10.35, 1.05, 1H), 5.59 (q, J=7.12, 1H), 3.97 (s, 3H), 1.68 (d, J=7.09, 3H).



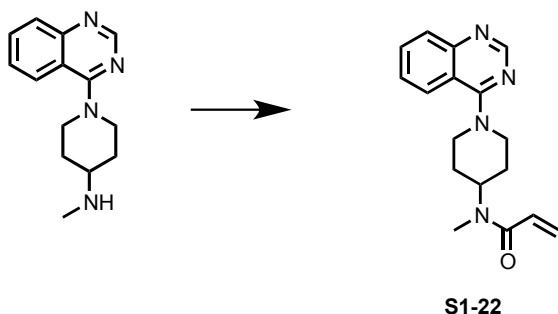

**S1-22** *N*-methyl-*N*-(1-(quinazolin-4-yl)piperidin-4-yl)acrylamide:

*N*-methyl-1-(1-(quinazolin-4-yl)piperidin-4-yl)piperidin-4-amine (53.7mg, 1 eq, 0.222 mmol) was dissolved in 2mL ACN. TEA was added (62uL, 2 eq, 0.443 mmol). The reaction was cooled to 0°C. Acryloyl chloride (18uL, 1 eq, 0.222 mmol) was added. The reaction was quenched with 5mL saturated NaHCO<sub>3</sub> and left stirring for 15 minutes at ambient temperature. The reaction was extracted with ethyl acetate (5mL x 3), dried over Na<sub>2</sub>SO<sub>4</sub>. The compound was purified by flash chromatography on silica gel (0-15% DCM:methanol), followed by RP-HPLC (25-55% gradient) to get the desired product (3.1mg, 5% yield), as an opaque oil. HRMS C<sub>17</sub>H<sub>21</sub>N<sub>4</sub>O [M+H]<sup>+</sup> expected mass: 297.1715; observed: 297.1717. <sup>1</sup>H NMR (500 MHz, MeOD) δ 8.59 (d, J=4.77, 1H), 8.48 (s, 1H), 8.06 (d, J=8.41, 1H), 7.82 (m, 1H), 7.57 (m, 1H), 6.90 (dd, 16.90, 10.90, 1H), 6.75 (dd, 16.88, 10.50, 1H), 6.23 (dd, J=16.91, 10.36, 1H), 5.76 (dd, 10.65, 19.7, 1H), 4.77 (m, 1H), 4.57 (m, 1H), 4.28 (m, 1H), 3.03 (s, 1H), 2.93 (s, 1H), 2.09 (m, 3H), 1.83 (m, 2H).

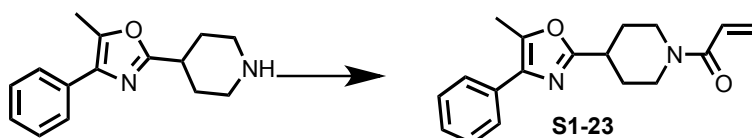

**S1-23** 1-(4-(5-methyl-4-phenyloxazol-2-yl)piperidin-1-yl)prop-2-en-1-one:

5-methyl-4-phenyl-2-(piperidin-4-yl)oxazole (27.0mg, 1eq, 0.111 mmol) was dissolved in 2mL CAN. TEA was added (31uL, 2eq, 0.223 mmol). The reaction was cooled to 0°C. Acryloyl chloride (9uL, 1 eq, 0.111 mmol) was added. The reaction was quenched with 5mL saturated NaHCO<sub>3</sub> and left stirring for 15 minutes at ambient temperature. The reaction was extracted with ethyl acetate (5mL x 3), and dried over Na<sub>2</sub>SO<sub>4</sub>. The compound was purified by flash chromatography on silica gel (5-100% hexanes: ethyl acetate), followed by RP-HPLC (45-95% gradient) to get the desired product (3.1mg, 5% yield), as a white solid. HRMS C<sub>18</sub>H<sub>21</sub>N<sub>2</sub>O<sub>2</sub> [M+H]<sup>+</sup> expected mass: 297.1603; observed: 297.1617. <sup>1</sup>H NMR (400 MHz, CDCl<sub>3</sub>) δ 7.62 (d, J=8.06, 2H), 7.41 (t, J=7.52, 2H), 7.29 (t, J= 7.42, 1H), 6.60 (dd, J=16.87, 10.59, 1H), 6.28 (dd, J=16.82, 1.90, 1H), 5.70 (dd, J=10.56, 1.84, 1H), 3.12 (m, 1H), 3.08 (m, 2H), 2.50 (s, 3H), 2.13 (m, 2H), 1.89 (m, 2H), 1.65 (m, 2H).

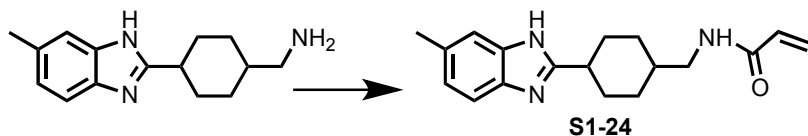

**S1-24** *N*-((4-(6-methyl-1*H*-benzo[*d*]imidazol-2-yl)cyclohexyl)methyl)acrylamide:

(4-(6-methyl-1*H*-benzo[*d*]imidazol-2-yl)cyclohexyl)methanamine (50.8mg, 1 eq, 0.209mmol) was dissolved in 2mL ACN. TEA was added (174uL, 6 eq, 1.254 mmol). The reaction was cooled to 0°C. Acryloyl chloride (17uL, 1 eq, 0.209 mmol) was added. The reaction was quenched with 5mL saturated NaHCO<sub>3</sub> and left stirring for 15 minutes at ambient temperature. The reaction was extracted with ethyl acetate (5mL x 3), dried over Na<sub>2</sub>SO<sub>4</sub>. The compound was purified by flash chromatography on silica gel (0-15% hexanes:EtOAc), followed by RP-HPLC (5-95% gradient) to get the desired product (4.6mg, 7% yield), as a white solid. HRMS C<sub>18</sub>H<sub>24</sub>N<sub>3</sub>O [M+H]<sup>+</sup> expected mass: 298.1919; observed: 298.1925. <sup>1</sup>H NMR (500 MHz, MeOD) δ 7.39 (d, J=8.35, 1H), 7.31 (s, 1H), 7.07 (d, J=8.35, 1H), 6.27 (dd, J=17.05, 9.41, 1H), 6.22 (dd, J = 17.05, 2.68, 1H), 5.66 (dd, J=9.41, 2.64, 1H), 3.18 (d, J=6.80, 2H), 2.89 (m, 1H), 2.45 (s, 3H), 2.16 (d, J=13.01, 2H), 1.76 (d, J=13.01, 2H), 1.69 (m, 2H), 1.66 (m, 1H), 1.19 (d, 2H).

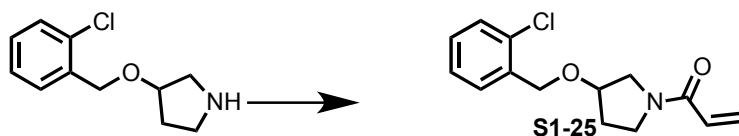

**S1-25** 1-(3-((2-chlorobenzyl)oxy)pyrrolidin-1-yl)prop-2-en-1-one:

3[(2-chlorobenzyl)oxy]pyrrolidine hydrochloride (50.3mg, 1 eq, 0.203mmol) was dissolved in 2mL ACN. TEA was added (57uL, 2 eq, 0.405 mmol). The reaction was cooled to 0°C. Acryloyl chloride (16uL, 1 eq, 0.203 mmol) was added. The reaction was quenched with 5mL saturated NaHCO<sub>3</sub> and left stirring for 15 minutes at ambient temperature. The reaction was extracted with ethyl acetate (5mL x 3), dried over Na<sub>2</sub>SO<sub>4</sub>. The compound was purified by flash chromatography on silica gel (5-100% hexanes:EtOAc), followed by RP-HPLC (45-95% gradient) to get the desired product (1.5mg, 3% yield), as an opaque oil. HRMS C<sub>14</sub>H<sub>17</sub>ClNO<sub>2</sub> [M+H]<sup>+</sup> expected mass: 266.0948; observed: 266.0959. <sup>1</sup>H NMR (500 MHz, MeOD, 1:1 rotamers) δ 7.48 (m, 1H), 7.38 (m, 1H), 7.29 (m, 2H), (6.63 + 6.58) (rotamers dd, J=16.83, 10.51, 1H), (6.27+6.26) (dd, rotamers, J=16.86, 1.88, 1H), (5.75+5.73) (rotamers, dd, J=10.46, 1.89, 1H), 4.65 (m, 2H), 4.32 (m, 1H), 3.75 (m, 2H), 3.68 (m, 1H), 3.56 (m, 1H), 2.14 (m, 2H).

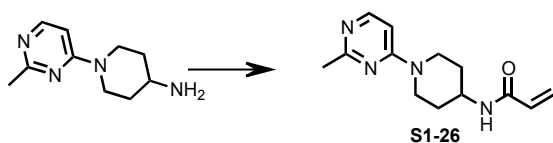

**S1-26** *N*-(1-(2-methylpyrimidin-4-yl)piperidin-4-yl)acrylamide:

1-(2-methylpyrimidin-4-yl)piperidin-4-amine (34.1mg, 1 eq, 0.177mmol) was dissolved in 2mL ACN. TEA was added (50uL, 2 eq, 0.355 mmol). The reaction was cooled to 0°C. Acryloyl chloride (14uL, 1 eq, 0.177 mmol) was added. The reaction was quenched with 5mL saturated NaHCO<sub>3</sub> and left stirring for 15 minutes at ambient temperature. The reaction was extracted with ethyl acetate (5mL x 3), dried over Na<sub>2</sub>SO<sub>4</sub>. The compound was purified by flash chromatography on silica gel (0-15% DCM:methanol), followed by RP-HPLC (20-55% gradient) to get the desired product (5.1mg, 12% yield), as a white solid. HRMS C<sub>13</sub>H<sub>19</sub>N<sub>4</sub>O [M+H]<sup>+</sup> expected mass: 247.1559; observed: 247.1561. <sup>1</sup>H NMR (500 MHz, MeOD) δ 8.32 (s, 1H), 8.04 (d, J=7.15, 1H), 6.83 (d, J=7.14, 1H), 6.58 (dd, J=6.58, 5.52, 1H), 6.24 (m, 2H), 4.10 (m, 1H), 3.26 (m, 2H), 2.50 (s, 3H), 2.04 (m, 2H), 1.51 (m, 2H).

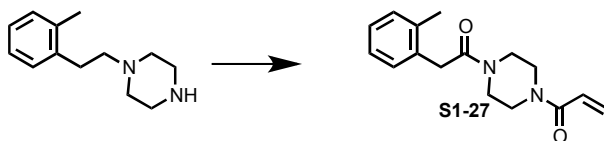

**S1-27** 1-(4-(2-(*o*-tolyl)acetyl)piperazin-1-yl)prop-2-en-1-one:

1-(piperazin-1-yl)-2-(*o*-tolyl)ethanone (67mg, 1 eq, 0.307mmol) was dissolved in 2mL ACN. TEA was added (86uL, 2 eq, 0.614 mmol). The reaction was cooled to 0°C. Acryloyl chloride (25uL, 1 eq, 0.307 mmol) was added. The reaction was quenched with 5mL saturated NaHCO<sub>3</sub> and left stirring for 15 minutes at ambient temperature. The reaction was extracted with ethyl acetate (5mL x 3), dried over Na<sub>2</sub>SO<sub>4</sub>. The compound was purified by RP-HPLC (5-95% gradient) to get the desired product 8.4mg, 10% yield), as an opaque oil. HRMS C<sub>16</sub>H<sub>21</sub>N<sub>2</sub>O<sub>2</sub> [M+H]<sup>+</sup> expected mass: 273.1603; observed: 273.1608. <sup>1</sup>H NMR (400 MHz, CDCl<sub>3</sub>) δ 7.15 (m, 4H), 6.53 (m, 1H), 6.31 (d, J=16.75, 1H), 5.73 (d, J=9.76, 1H), 3.71 (s, 4H), 3.57 (s, 2H), 3.43 (s, 2H), 2.29 (s, 3H).

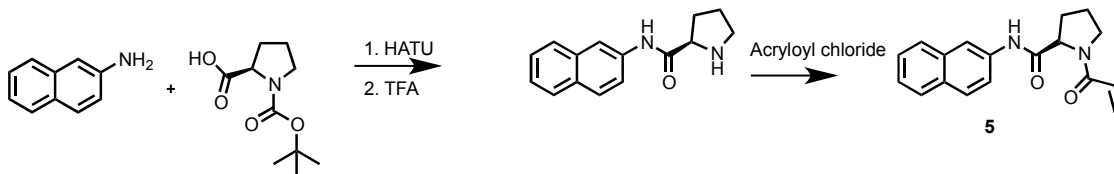

### 5 (*R*)-1-acryloyl-*N*-(naphthalen-2-yl)pyrrolidine-2-carboxamide:

*N*-Boc-L-proline (100mg, 0.465 mmol, 1 eq) was dissolved in 1mL DMF and DIPEA (324 $\mu$ L, 4 eq, 1.86 mmol). The solution was cooled to 0°C and HATU (194mg, 0.511 mmol, 1.1 eq) was added. The reaction was stirred for 20 minutes followed by an addition of 2-aminonaphthalene (73mg, 0.511 mmol, 1.1eq). After 2-5 hours, the solution was diluted with 10mL brine and extracted with EtOAc (3x10mL). The combined organic layers were dried over Na<sub>2</sub>SO<sub>4</sub>, filtered, and evaporated to dryness *in vacuo*. The residue was purified by flash chromatography on silica gel (5-100%) EtOAc:hexanes to afford the desired product, (*R*)-*tert*-butyl 2-(naphthalen-2-ylcarbamoyl)pyrrolidine-1-carboxylate.

The product was dissolved in 2mL DCM. The mixture was cooled to 0°C and 1mL TFA was added. When the reaction was complete, the mixture was quenched using 5mL NaHCO<sub>3</sub> and the product was extracted with 3x3mL DCM. The crude product, (*R*)-*N*-(naphthalen-2-yl)pyrrolidine-2-carboxamide, was used without further purification.

(*R*)-*N*-(naphthalen-2-yl)pyrrolidine-2-carboxamide (38.6 mg, 0.161 mmol, 1 eq) was dissolved in 2mL ACN to which TEA (45 $\mu$ L, 0.321 mmol, 2 eq) was added. The solution was cooled to 0°C upon which acryloyl chloride (14 $\mu$ L, 0.177 mmol, 1.1 eq) was added. After 30 minutes, the reaction was quenched with 5mL NaHCO<sub>3</sub>. The solution was left to stir for 15 minutes. The mixture was extracted with ethyl acetate (3x5mL). The combined organic layers were dried with Na<sub>2</sub>SO<sub>4</sub>, filtered, and evaporated *in vacuo*. The residue was purified by flash chromatography on silica gel (5-100%) hexanes: ethyl acetate to get the desired product (*R*)-1-acryloyl-*N*-(naphthalen-2-yl)pyrrolidine-2-carboxamide (14.6mg, 31% yield), as an opaque oil.

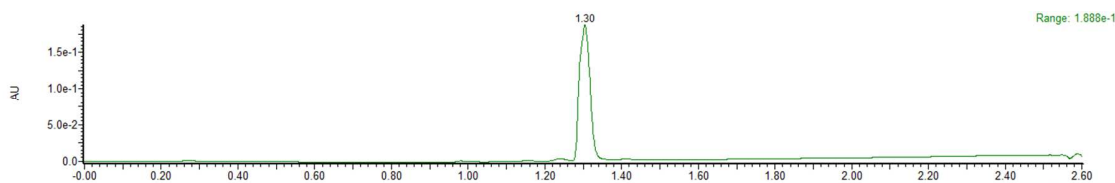

HRMS C<sub>18</sub>H<sub>18</sub>N<sub>2</sub>O<sub>2</sub>Na [M+Na]<sup>+</sup> expected mass: 317.1266; observed: 317.1267. <sup>1</sup>H NMR (400 MHz, CDCl<sub>3</sub>)  $\delta$  9.99 (s, 1H), 8.23 (s, 1H), 7.74 (m, 3H), 7.47 (dd, J=8.84, 2.12, 1H), 7.42 (t, J=6.82, 1H), 7.36 (t, J=7.44, 1H), 6.52 (J=6.10, 2H), 5.82 (t, J=6.10, 1H), 4.94 (d, J=7.82, 1H), 3.72 (m, 1H), 3.58 (m, 1H), 2.68 (dd, J=12.62, 6.50, 1H), 2.21 (m, 1H), 2.09 (m, 1H), 1.86 (m, 1H). <sup>13</sup>C NMR (500 MHz, CDCl<sub>3</sub>)  $\delta$  169.01, 166.81, 135.92, 134.00, 130.60, 129.68, 128.66, 127.98, 127.76, 127.60, 126.42, 124.84, 120.24, 116.42, 60.99, 47.84, 26.46, 25.23.

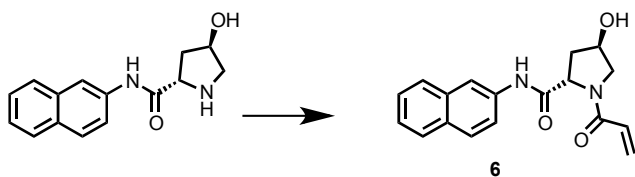

### 6 (2*S*,4*R*)-1-acryloyl-4-hydroxy-*N*-(naphthalen-2-yl)pyrrolidine-2-carboxamide:

4-hydroxy-*N*-(naphthalen-2-yl)pyrrolidine-2-carboxamide (50mg, 1 eq, 0.195 mmol) was dissolved in 4mL mixture of 1:1 ACN:DMF. TEA (164uL, 1.170 mmol, 6 eq) was added. The solution was cooled to 0°C upon which acryloyl chloride (17uL, 0.215 mmol, 1.1 eq) was added. After 30 minutes, the reaction was quenched with 5mL NaHCO<sub>3</sub>. The solution was left to stir for 15 minutes. The mixture was extracted with ethyl acetate (3x5mL). The combined organic layers were dried with Na<sub>2</sub>SO<sub>4</sub>, filtered, and evaporated *in vacuo*. The residue was purified by flash chromatography on silica gel (5-100%) hexanes: ethyl acetate to get the desired product (2*S*,4*R*)-1-acryloyl-4-hydroxy-*N*-(naphthalen-2-yl)pyrrolidine-2-carboxamide (10.5mg, 17% yield), as a white solid. MS

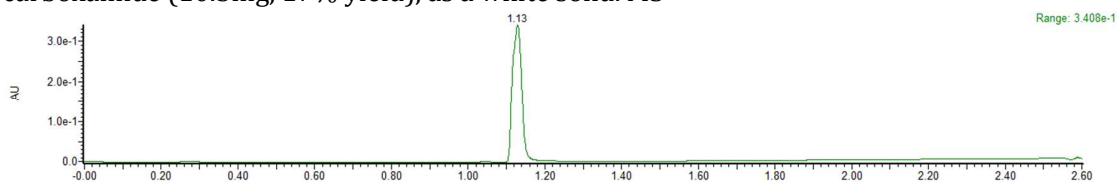

HRMS C<sub>18</sub>H<sub>18</sub>N<sub>2</sub>O<sub>3</sub>Na [M+Na]<sup>+</sup> expected mass: 333.1215; observed: 333.1219. <sup>1</sup>H NMR (400 MHz, (CD<sub>3</sub>)<sub>2</sub>SO, 9:1 rotamers) δ (10.28+10.41) (s, 1H), 8.29 (s, 1H), 7.83 (m, 3H), 7.59 (d, J=8.85, 1H), 7.46 (t, J=6.76, 1H), 7.39 (t, 6.90, 1H), (6.63 + 6.36) (dd, J=16.67, 10.05, 1H), 6.13 (J=16.62, 2.08, 1H), (5.71 + 5.64) (J=10.15, 2.28, 1H), 5.20 (d, J=3.56, 1H), (4.62 + 4.76) (t, J=7.93, 1H), (4.43 + 4.35) (s, 1H), 3.76 (dd, J=10.69, 4.49, 1H), 3.58 (d, J=10.69, 1H), 2.16 (m, 1H), 1.99 (m, 1H). <sup>13</sup>C NMR (500 MHz, MeOD) δ 172.94, 167.25, 137.18, 135.21, 132.19, 129.87, 129.52, 128.88, 128.59, 127.46, 126.05, 121.29, 121.13, 118.06, 71.22, 61.38, 56.94, 39.18.

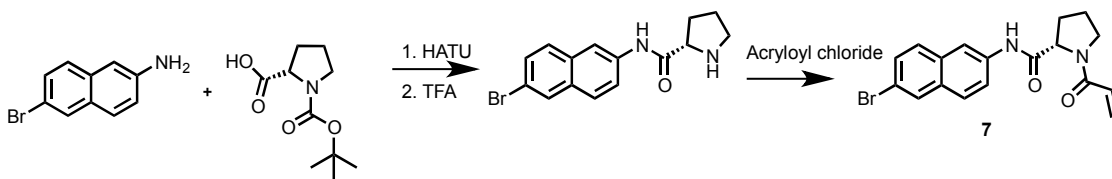

### 7 (S)-1-acryloyl-*N*-(6-bromonaphthalen-2-yl)pyrrolidine-2-carboxamide:

*N*-Boc-*L*-proline (100mg, 0.465 mmol, 1 eq) was dissolved in 1mL DMF. The solution was cooled to 0°C and HATU (582mg, 1.533 mmol, 3.3 eq) was added. The reaction was stirred for 15 minutes followed by an addition of 2-amino-6-bromo-naphthalene (114mg, 0.511 mmol, 1.1eq). After 6 hours, the solution was diluted with 10mL brine and extracted with EtOAc (3x10mL). The combined organic layers were dried over Na<sub>2</sub>SO<sub>4</sub>, filtered, and evaporated to dryness *in vacuo*. The residue was purified by flash chromatography on silica gel (5-100%) EtoAC:hexanes to afford the desired product, (2*S*,4*R*)-*tert*-butyl-2-((6-bromonaphthalen-2-yl)carbamoyl)-4-hydroxypyrrolidine-1-carboxylate, (217mg, yield quantitative).

The product was dissolved in 2mL DCM. The mixture was cooled to 0°C and 1mL TFA was added. When the reaction was complete, the mixture was quenched using 5mL NaHCO<sub>3</sub> and the product was extracted with 3x3mL DCM. The crude product, (*S*)-*N*-(6-bromonaphthalen-2-yl)pyrrolidine-2-carboxamide was used without further purification.

(*S*)-*N*-(6-bromonaphthalen-2-yl)pyrrolidine-2-carboxamide (83.8 mg, 0.263 mmol, 1 eq) was dissolved in 2mL ACN to which TEA (73μL, 0.525 mmol, 2 eq) was added. The solution was cooled to 0°C upon which acryloyl chloride (8μL, 0.104 mmol, 1.1 eq) was added. After 30 minutes, the reaction was quenched with 5mL NaHCO<sub>3</sub>. The solution was left to stir for 15 minutes. The mixture was extracted with ethyl acetate (3x5mL). The combined organic layers were dried with Na<sub>2</sub>SO<sub>4</sub>, filtered, and evaporated *in vacuo*. The residue was purified by flash chromatography on silica gel (5-100%) hexanes: ethyl acetate, followed by RP-HPLC gradient of 5-95% to afford the desired product (*S*)-1-acryloyl-*N*-(6-bromonaphthalen-2-yl)pyrrolidine-2-carboxamide (14.2mg, 14%yield), as an opaque oil.

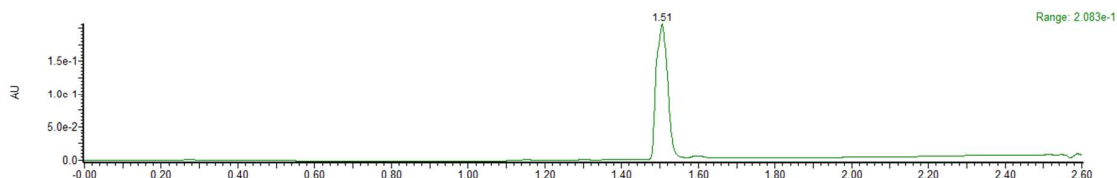

<sup>1</sup>H NMR (400 MHz, CDCl<sub>3</sub>). HRMS C<sub>18</sub>H<sub>18</sub>BrN<sub>2</sub>O<sub>2</sub> [M+H]<sup>+</sup> expected mass: 373.0552; observed: 373.0553. δ 10.10 (s, 1H), 8.20 (s, 1H), 7.86 (s, 1H), 7.61 (d, J=8.78, 1H), 7.56 (d, J=8.78, 1H), 7.44 (m, 2H), 6.52 (dd, J=6.03, 1.41, 2H), 5.83 (dd, J=6.71, 5.44, 1H), 4.94 (d, J=7.68, 1H), 3.73 (m, 1H), 3.60 (m, 1H), 2.64 (m, 1H), 2.23 (m, 1H), 2.10 (m, 1H), 1.90 (m, 1H) <sup>13</sup>C NMR (400 MHz, CDCl<sub>3</sub>) δ 169.23, 166.75, 136.38, 132.42, 131.52, 129.74, 129.70, 129.59, 129.38, 127.97, 127.70, 121.18, 118.54, 116.22, 61.04, 47.89, 26.64, 25.24.

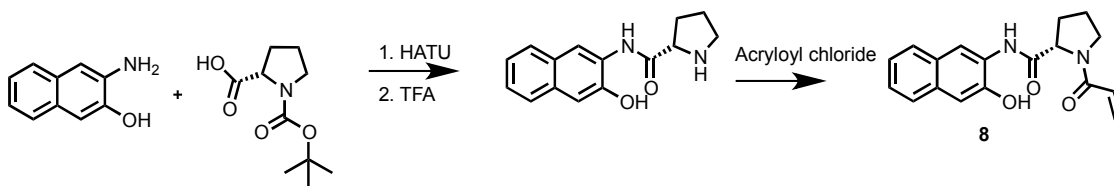

#### **8** ((*S*)-1-acryloyl-*N*-(3-hydroxynaphthalen-2-yl)pyrrolidine-2-carboxamide):

*N*-Boc-*L*-proline (100mg, 0.465 mmol, 1 eq) was dissolved in 1mL DMF. The solution was cooled to 0°C and HATU (194mg, 0.511 mmol, 1.1 eq) was added. The reaction was stirred for 15 minutes followed by an addition of 3-amino-2-naphthol (81mg, 0.511 mmol, 1.1eq). After 12-18 hours, the solution was diluted with 10mL brine and extracted with EtOAc (3x10mL). The combined organic layers were dried over Na<sub>2</sub>SO<sub>4</sub>, filtered, and evaporated to dryness *in vacuo*. The residue was purified by flash chromatography on silica gel (5-100%) hexanes: ethyl acetate to afford the desired product, (*S*)-*tert*-butyl 2-((3-hydroxynaphthalen-2-yl)carbamoyl)pyrrolidine-1-carboxylate, (27.3mg, 19% yield).

The product was dissolved in 2mL DCM. The mixture was cooled to 0°C and 1mL TFA was added. When the reaction was complete, the mixture was quenched using 5mL NaHCO<sub>3</sub> and the product was extracted with 3x3mL DCM. The crude product, ((*S*)-*N*-(3-hydroxynaphthalen-2-yl)pyrrolidine-2-carboxamide, was used without further purification.

((*S*)-*N*-(3-hydroxynaphthalen-2-yl)pyrrolidine-2-carboxamide (24.3 mg, 0.095 mmol, 1 eq) was dissolved in 3mL ACN to which TEA (80uL, 0.570 mmol, 6 eq) was added. The solution was cooled to 0°C upon which acryloyl chloride (8uL, 0.104 mmol, 1.1 eq) was added. After 30 minutes, the reaction was quenched with 5mL NaHCO<sub>3</sub>. The solution was left to stir for 15 minutes. The mixture was extracted with ethyl acetate (3x5mL). The combined organic layers were dried with Na<sub>2</sub>SO<sub>4</sub>, filtered, and evaporated *in vacuo*. The residue was purified by flash chromatography on silica gel (5-100%) hexanes: ethyl acetate, followed by RP-HPLC gradient of 5-95% to afford the desired product ((*S*)-1-acryloyl-*N*-(3-hydroxynaphthalen-2-yl)pyrrolidine-2-carboxamide (1.7mg, 6% yield), as a white powder.

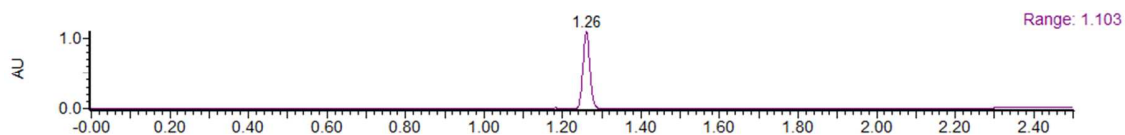

HRMS C<sub>18</sub>H<sub>18</sub>N<sub>2</sub>O<sub>3</sub>Na [M+Na]<sup>+</sup> expected mass: 333.1215; observed: 333.1223. <sup>1</sup>H NMR (400 MHz, CDCl<sub>3</sub>) δ 10.21 (s, 1H), 7.83 (s, 1H), 7.65 (d, J=7.99, 1H), 7.63 (d, J=7.99, 1H), 7.32 (m, 3H), 6.54 (d, J=5.93, 2H), 5.85 (t, J=5.92, 1H), 5.02 (d, J=7.51, 1H), 3.76 (t, J=9.13, 1H), 3.63 (q, J=9.06, 1H), 2.66 (q, J=6.21, 1H), 2.24 (m, 1H), 2.13 (m, 1H), 1.95 (m, 1H). <sup>13</sup>C NMR (500 MHz, CDCl<sub>3</sub>) δ 170.47, 167.06, 147.27, 132.54, 130.28, 128.60, 127.75, 127.72, 127.29, 126.17, 125.14, 124.06, 119.90, 113.32, 60.72, 47.92, 26.77, 25.28.

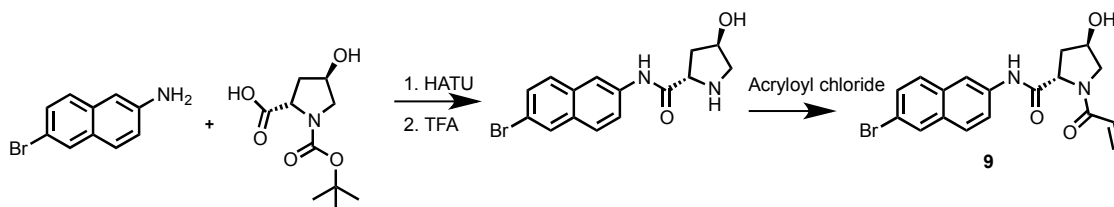

**9** (*2S,4R*)-1-acryloyl-*N*-(6-bromonaphthalen-2-yl)-4-hydroxypyrrolidine-2-carboxamide:

Trans-*N*-(tert-Butoxycarbonyl)-4-hydroxy-L-proline (100mg, 0.433 mmol, 1 eq) was dissolved in 1mL DMF. The solution was cooled to 0°C and HATU (329mg, 0.865mmol, 2 eq) was added. The reaction was stirred for 15 minutes followed by an addition of 2-amino-6-bromo-naphthalene (106mg, 0.476 mmol, 1.1eq). DMAP (5mg, 0.0433mmol, 0.1 eq) was added. After heating the solution to 50°C for 6 hours, the solution was diluted with 10mL brine and extracted with ethyl acetate (3x10mL). The combined organic layers were dried over Na<sub>2</sub>SO<sub>4</sub>, filtered, and evaporated to dryness *in vacuo*. The residue was purified by flash chromatography on silica gel (5-100%) hexanes: ethyl acetate to afford the desired product, (*2S,4R*)-*tert*-butyl 2-((6-bromonaphthalen-2-yl)carbamoyl)-4-hydroxypyrrolidine-1-carboxylate (199.8mg, yield quantitative).

The product was dissolved in 2mL DCM. The mixture was cooled to 0°C and 1mL TFA was added. After 5 hours, the solvent and excess TFA was removed *in vacuo* with 3x 5mL toluene. The crude product, (2*S*,4*R*)-*tert*-butyl 2-((6-bromonaphthalen-2-yl)carbamoyl)-4-hydroxypyrrolidine-1-carboxylate, was used without further purification.

(2*S*,4*R*)-*tert*-butyl 2-((6-bromonaphthalen-2-yl)carbamoyl)-4-hydroxypyrrolidine-1-carboxylate (37.3 mg, 0.086 mmol, 1 eq) was dissolved in 2mL ACN to which TEA (24uL, 0.172 mmol, 2 eq) was added. The solution was cooled to 0°C upon which acryloyl chloride (8uL, 0.094 mmol, 1.1 eq) was added. After 30 minutes, the reaction was quenched with 5mL NaHCO<sub>3</sub>. The solution was left to stir for 15 minutes. The mixture was extracted with ethyl acetate (3x5mL). The combined organic layers were dried with Na<sub>2</sub>SO<sub>4</sub>, filtered, and evaporated *in vacuo*. The residue was purified by flash chromatography on silica gel (5-90%) hexanes: ethyl acetate to afford the desired product (2*S*,4*R*)-1-acryloyl-*N*-(6-bromonaphthalen-2-yl)-4-hydroxypyrrolidine-2-carboxamide (8.7mg, 26% yield), as a white powder.

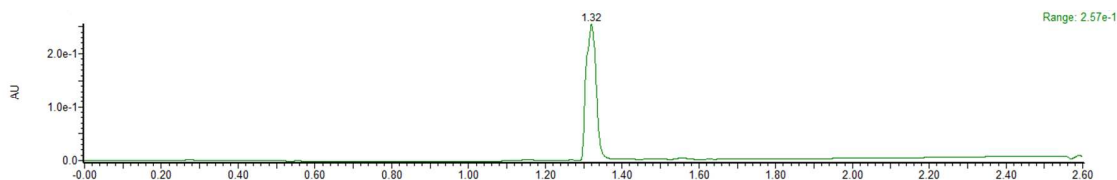

HRMS C<sub>18</sub>H<sub>17</sub>BrN<sub>2</sub>O<sub>3</sub>Na [M+Na]<sup>+</sup> expected mass: 411.032; observed: 411.0333. <sup>1</sup>H NMR (400 MHz, (CD<sub>3</sub>)<sub>2</sub>SO, 4:1 rotamers) δ (10.36+10.48) (s, 1H), 8.32 (s, 1H), 8.12 (s, 1H), 7.86 (d, J=8.77, 1H), 7.77 (d, J=8.77, 1H), 7.63 (dd, J=8.86, 2.05, 1H), 7.57 (dd, J=8.81, 1.98, 1H), (6.63+6.35) (dd, J=16.73,10.30, 1H), 6.13 (dd, J=16.77, 2.05, 1H), (5.71 + 5.64) (dd, J=10.38, 2.16, 1H), (5.20 + 5.14) (d, J=3.38, 1H), (4.61+4.78) (t, J=7.94, 1H), (4.43 + 4.34) (s, 1H), 3.76 (dd, J=10.77, 4.23, 1H), 3.58 (d, J=10.94, 1H), 2.15 (m, 1H), 1.99 (m, 1H). <sup>13</sup>C NMR (500 MHz, (CD<sub>3</sub>)<sub>2</sub>SO) δ 170.87, 163.66, 137.25, 136.70, 131.95, 130.80, 129.52, 129.41, 129.32, 127.65, 127.38, 120.99, 117.24, 115.06, 68.92, 59.45, 55.40, 37.99.

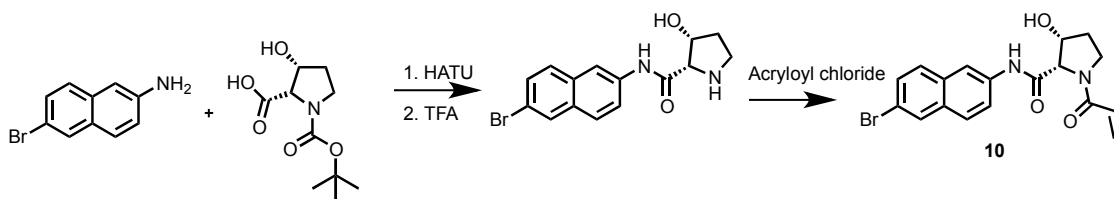

**10** (2*S*,3*R*)-1-acryloyl-*N*-(6-bromonaphthalen-2-yl)-3-hydroxypyrrolidine-2-carboxamide:

*N*-*boc*-*cis*-3-hydroxy-*L*-proline (57mg, 0.248 mmol, 1.1eq) was dissolved in 2mL pyridine. The solution was cooled to 0°C and HATU (171mg, 2 eq, 0.450mmol) was added. The reaction was stirred for 15 minutes followed by an addition of 2-amino-6-bromonaphthalene (50mg, 0.225 mmol, 1eq). After heating the solution to 70°C in a reflux condenser for 2.5 hours, the solution was diluted with 10mL brine and extracted with ethyl acetate (3x10mL). The combined organic layers were dried over Na<sub>2</sub>SO<sub>4</sub>, filtered, and evaporated to dryness *in vacuo*. The residue was purified by flash chromatography on silica



gel (5-100%) hexanes: ethyl acetate to afford the desired product (2*S*,3*R*)-*tert*-butyl 2-((6-bromonaphthalen-2-yl)carbamoyl)-3-hydroxypyrrolidine-1-carboxylate (60.5mg, 62% yield).

The product was dissolved in 2mL DCM. The mixture was cooled to 0°C and 1mL TFA was added. After 5 hours, the solvent and excess TFA was removed *in vacuo* with 3x 5mL toluene. The crude product, (2*S*,3*R*)-*N*-(6-bromonaphthalen-2-yl)-3-hydroxypyrrolidine-2-carboxamide, was used without further purification.

(2*S*,3*R*)-*N*-(6-bromonaphthalen-2-yl)-3-hydroxypyrrolidine-2-carboxamide (53.2 mg, 0.159 mmol, 1 eq) was dissolved in 2mL ACN to which TEA (44uL, 0.318 mmol, 2 eq) was added. The solution was cooled to 0°C upon which acryloyl chloride (13uL, 0.159 mmol, 1 eq) was added. After 30 minutes, the reaction was quenched with 5mL NaHCO<sub>3</sub>. The solution was left to stir for 15 minutes. The mixture was extracted with EtOAc (3x5mL). The combined organic layers were dried with Na<sub>2</sub>SO<sub>4</sub>, filtered, and evaporated *in vacuo*. The residue was purified by flash chromatography on silica gel (5-100%) EtOAc:hexanes, followed by (0-15%) dichloromethane: methanol, to afford the desired product, (2*S*,3*R*)-1-acryloyl-*N*-(6-bromonaphthalen-2-yl)-3-hydroxypyrrolidine-2-carboxamide (6.6mg, 11% yield), as a white powder.

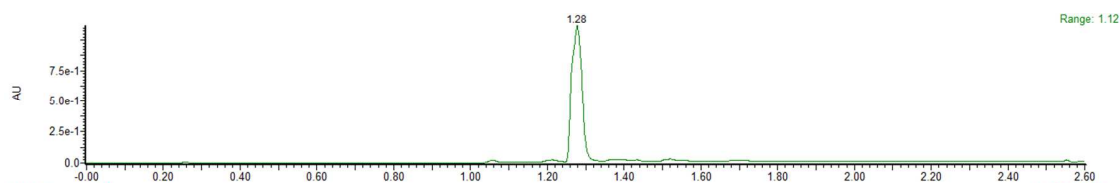

HRMS C<sub>18</sub>H<sub>17</sub>BrN<sub>2</sub>O<sub>3</sub>Na [M+Na]<sup>+</sup> expected mass: 411.032; observed: 411.0328. <sup>1</sup>H NMR (400 MHz, MeOD, 75:25 rotamers) δ 8.25 (s, 1H), 7.99 (s, 1H), 7.76 (dd, J=9.85, 9.10, 1H), 7.69 (d, J=8.55, 1H), 7.65 (dd, J=8.55, 2.01, 1H), 7.53 (m, 1H), (6.68+6.43) (dd, J=16.93, 10.49, 1H), 6.28 (J=16.84, 1.90, 1H), (5.78+5.71) (dd, J=10.51, 1.90, 1H), 4.70 (m, 1H), 4.67 (m, 1H), 3.96 (m, 1H), 3.74 (m, 2H), 2.21 (m, 1H). <sup>13</sup>C NMR (500 MHz, MeOD, 75:25 rotamers) δ 170.00, 167.25, 137.93, 133.70, 133.04, (130.70+130.64), (130.60+130.58), (130.45+130.50), 129.47, 128.80, 128.59, (122.64+122.46), 119.40, 117.90, (71.88+73.55), (66.03+66.21), (46.47+45.57), (34.04+31.83).

**11** and **12** were synthesized and characterized as described in Ostrem *et al.*<sup>4</sup>

Acrylamide library (N=62) synthesis is described in Bateman *et al* and Roberts *et al.*<sup>39,40</sup>

References

- (39) Bateman, L. A.; Nguyen, T. B.; Roberts, A. M.; Miyamoto, D. K.; Ku, W.-M.; Huffman, T. R.; Petri, Y.; Heslin, M. J.; Contreras, C. M.; Skibola, C. F.; Olzmann, J. A.; Nomura, D. K. Chemoproteomics-Enabled Covalent Ligand Screen Reveals a Cysteine Hotspot in Reticulon 4 That Impairs ER Morphology and Cancer Pathogenicity. *Chem. Commun. (Camb.)* **2017**.
- (40) Roberts, A. M.; Miyamoto, D. K.; Huffman, T. R.; Bateman, L. A.; Ives, A. N.; Akopian, D.; Heslin, M. J.; Contreras, C. M.; Rape, M.; Skibola, C. F.; Nomura, D. K. Chemoproteomic Screening of Covalent Ligands Reveals UBA5 as a Novel Pancreatic Cancer Target. *ACS Chem. Biol.* **2017**, *12* (4), 899–904.
